# Supplementary material for: Mn-doped Ni2P: nanocrystal-decorated amorphous nanosheets for efficient electrooxidation of 5-hydroxymethylfurfural
Source: Royal Society of Chemistry journal article supplement (doi:10.1039/d3cc02083e), 2023-01-01
Supplement: d3cc02083e1.pdf [file d3cc02083e1.pdf]

## **Electronic Supplementary Information (ESI)**

### **Mn-doped Ni<sub>2</sub>P: nanocrystals-decorated amorphous nanosheets for efficient electrooxidation of 5-hydroxymethylfurfural**

Hui Xu,<sup>a</sup> Jiahui Bi,<sup>a</sup> Ting Sang,<sup>a</sup> Wenke Wang,<sup>a</sup> Jingcheng Hao,<sup>a</sup> Zhonghao Li\*<sup>a</sup>

<sup>a</sup> Key Laboratory of Colloid and Interface Chemistry, Ministry of Education, Shandong  
University, Jinan, 250100, China, E-mail: zhonghaoli@sdu.edu.cn

## **Experimental Section**

### **Materials and Chemicals**

Choline chloride (ChCl), oxalic acid ( $\text{H}_2\text{C}_2\text{O}_4$ ), potassium chloride (KCl), and sodium hypophosphite ( $\text{NaH}_2\text{PO}_2$ ) were all purchased from Aladdin Chemistry Co., Ltd. Potassium hydroxide (KOH) and nickel chloride hexahydrate ( $\text{NiCl}_2 \cdot 6\text{H}_2\text{O}$ ) were obtained from Sinopharm Chemical Reagent Co., Ltd. Manganese nitrate tetrahydrate ( $\text{Mn}(\text{NO}_3)_2 \cdot 4\text{H}_2\text{O}$ ) was supplied by Shanghai Macklin Biochemical Co., Ltd. 5-hydroxymethylfurfural (HMF), 2,5-furandicarboxylic acid (FDCA), 5-formyl-2-furancarboxylic acid (FFCA) and 5-hydroxymethyl-2-furancarboxylic acid (HMFCFA) were purchased from Alfa-Aesar. 2,5-diformylfuran (DFF) was purchased from Tokyo Chemical Industry Co., Ltd. 5 wt% Nafion solution was purchased from the Sigma Co., Ltd. Carbon cloth was obtained from Changsha Lyrun Material Co., Ltd. Nafion 115 membrane was purchased from Wuhan GaossUnion technology Co., Ltd.

### **Preparation of choline chloride/oxalic acid (ChCl/OA) DES**

The deep eutectic solvent (DES) was prepared based on the literature.<sup>1</sup> Specifically, equimolar amounts of choline chloride (ChCl) and oxalic acid (OA) were mixed by magnetic stirring at 80 °C. The (ChCl/OA) DES was obtained when a colorless and transparent liquid was formed.

### **Preparation of Mn-doped $\text{Ni}_2\text{P}$**

The Mn-doped  $\text{Ni}_2\text{P}$  catalysts were labeled as  $\text{Mn-xNi}_2\text{P}$  ( $\text{Mn-7Ni}_2\text{P}$ ,  $\text{Mn-5Ni}_2\text{P}$ , and  $\text{Mn-3Ni}_2\text{P}$ ), where x represents the original feed atomic ratio of Ni/Mn salts. In a typical

procedure for Mn-5Ni<sub>2</sub>P, 0.028 mmol Mn(NO<sub>3</sub>)<sub>2</sub>·4H<sub>2</sub>O and 0.14 mmol NiCl<sub>2</sub>·6H<sub>2</sub>O were dissolved in 1 mL ChCl/OA DES and subjected to ultrasonication at 50 °C until a well-dispersed solution was obtained. The solution was then transferred to a microwave oven and microwaved at 100 W for 15 s to obtain the Mn/Ni-based precursors. Then, the precursors were recovered, rinsed with ethanol, and dried under vacuum at room temperature overnight. After that, NaH<sub>2</sub>PO<sub>2</sub> and the dried precursors were placed in the upstream and middle of the corundum tube of the tube furnace for heating treatment at 350 °C for 2 h at 10 °C min<sup>-1</sup> in N<sub>2</sub> atmosphere. The obtained Mn-Ni<sub>2</sub>P was washed with water and ethanol. Finally, the samples were dried in the vacuum oven for 12 h. For comparison, the Mn-7Ni<sub>2</sub>P and Mn-3Ni<sub>2</sub>P were also prepared using the same method as above. Additionally, Ni<sub>x</sub>P was synthesized by the same procedure without the addition of Mn(NO<sub>3</sub>)<sub>2</sub>·4H<sub>2</sub>O.

### **Characterizations**

X-ray diffraction (XRD) pattern was characterized on the Rigaku SmartLab 9KW X-ray diffractometer. Transmission electron microscopy (TEM) was performed on a JEM-1400 microscope. The high-resolution transmission electron microscopy (HRTEM), high-angle annular dark field (HAADF)-scanning transmission electron microscopy (STEM) and energy-dispersive X-ray (EDX) were tested on the FEI Titan G2 60-300. Energy-dispersive X-ray (EDX) spectra was obtained by Zeiss Gemini 300. X-ray photoelectron spectroscopy (XPS) measurements were performed by a Thermo Fisher ESCALAB XI. Nitrogen adsorption-desorption tests were conducted on the micropolitics ASAP 2460. High-performance liquid chromatography (HPLC) analysis

was tested using an Agilent G7114A system.

### **Electrochemical Measurements**

Electrochemical testing was conducted on the electrochemical workstation (CHI Model 760E). For preparation of catalyst ink, 4 mg of catalyst was added in the mixture of Nafion solution (20  $\mu\text{L}$ , 5 wt %), ethanol (160  $\mu\text{L}$ ), and water (140  $\mu\text{L}$ ) under ultrasonication. The catalyst suspension was then coated on the carbon cloth ( $1 \times 1 \text{ cm}^2$ ) as a working electrode (loading of 4  $\text{mg cm}^{-2}$ ). Platinum foil (counter electrode), Ag/AgCl electrode (reference electrode) and catalyst-loaded carbon cloth (working electrode) were used for constructing the three electrode setup. All potentials were normalized to reversible hydrogen electrode (RHE) by the formula:

$$E (\text{RHE}) = E (\text{Ag/AgCl}) + 0.197 + 0.059 \times \text{pH\#} \quad (1)$$

The solution of 1.0 M KOH (10 mL) with or without HMF (10 mM) was used as the electrolyte. Electrooxidation performance of the catalysts was studied through chronoamperometry at 1.43 V. Linear sweep voltammetry (LSV) was conducted with a scanning rate of 10  $\text{mV s}^{-1}$ . 1 Hz to 100 kHz frequencies was used for electrochemical impedance spectroscopy (EIS) characterization, and cyclic voltammetry (CV) was performed to determine capacitance (Cdl).

### **Products analysis**

Specifically, 10  $\mu\text{L}$  solution during chronoamperometry at 1.43 V was removed from the electrolyte and diluted to 0.5 mL for HPLC analysis.

HMF conversion, FDCA yield, and Faraday efficiency (FE) were calculated using below equations.

$$\text{HMF conversion (\%)} = \left[ n \left( \text{HMF}_{\text{consumed}} \right) / n \left( \text{HMF}_{\text{initial}} \right) \right] \times 100 \quad (2)$$

$$\text{FDCA yield (\%)} = \left[ n \left( \text{FDCA}_{\text{formed}} \right) / n \left( \text{HMF}_{\text{initial}} \right) \right] \times 100 \quad (3)$$

$$\text{Faradaic efficiency (\%)} = \left[ n \left( \text{FDCA}_{\text{formed}} \right) / (Q / (6 \times F)) \right] \times 100 \quad (4)$$

$Q$ : total passed charge,  $F$ : Faraday constant (96485 C mol<sup>-1</sup>),  $n$ : mol of reactant.

### Density functional theory (DFT) Calculation

We carried out all the DFT calculations in the Vienna *ab initio* simulation (VASP5.4.4) code.<sup>2</sup> The exchange-correlation was simulated with PBE functional and the ion-electron interactions were described by the PAW method.<sup>3, 4</sup> The vdWs interaction was included by using the empirical DFT-D3 method.<sup>5</sup> The Monkhorst-Pack-grid-mesh-based Brillouin zone k-points were set as 1×1×1 for all periodic structures with the cutoff energy of 400 eV. The convergence criteria were set as 0.01 eV Å<sup>-1</sup> and 10<sup>-4</sup> eV in force and energy, respectively. An at least 20 Å vacuum layer along the  $z$  direction was employed to avoid interlayer interference.

The adsorption free energy ( $\Delta G_{\text{adsorption}}$ ) was calculated using the expression

$$\Delta E_{\text{adsorption}} = E_{\text{total}} - E_{\text{substrate}} - E_{\text{adsorbate}} \quad (5)$$

$$\Delta G_{\text{adsorption}} = \Delta E_{\text{adsorption}} + \Delta ZPE - \Delta TS \quad (6)$$

where  $E_{\text{substrate}}$  is the energy of the surface of the materials,  $E_{\text{adsorbate}}$  represents the energy of the adsorbates,  $E_{\text{total}}$  represents the total energy of the single molecule adsorption system. The  $ZPE$  and  $TS$  are zero point energy and the product of temperature entropy.

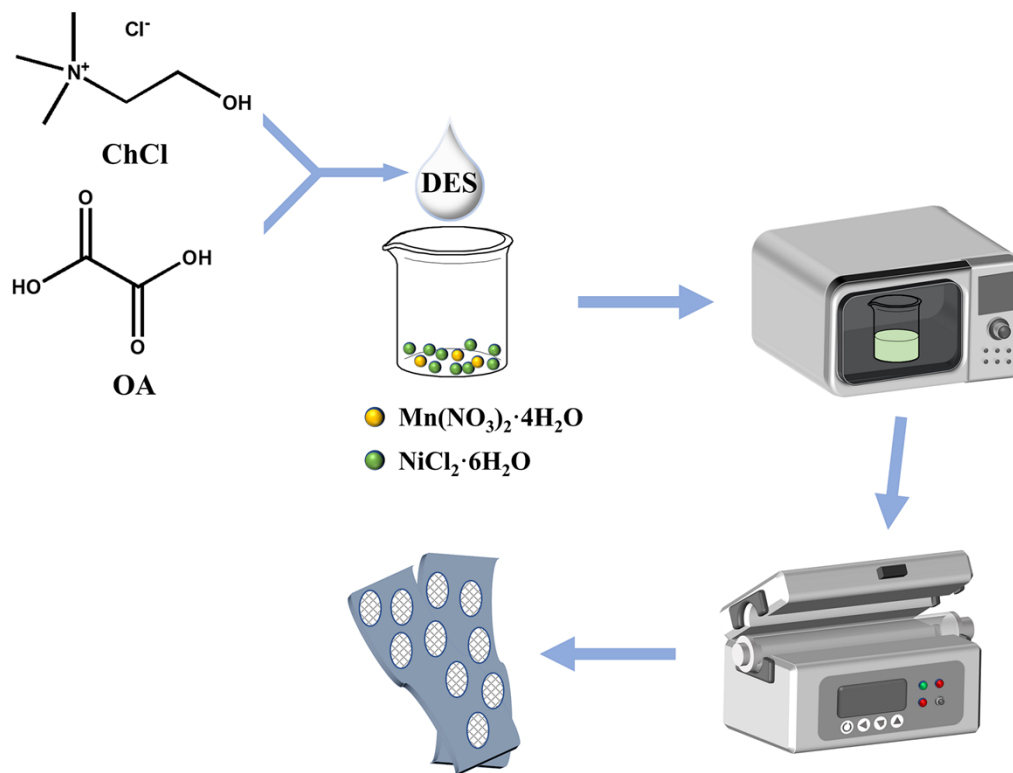

**Fig. S1** Schematic diagram of fabricating Mn-doped Ni<sub>2</sub>P catalysts.

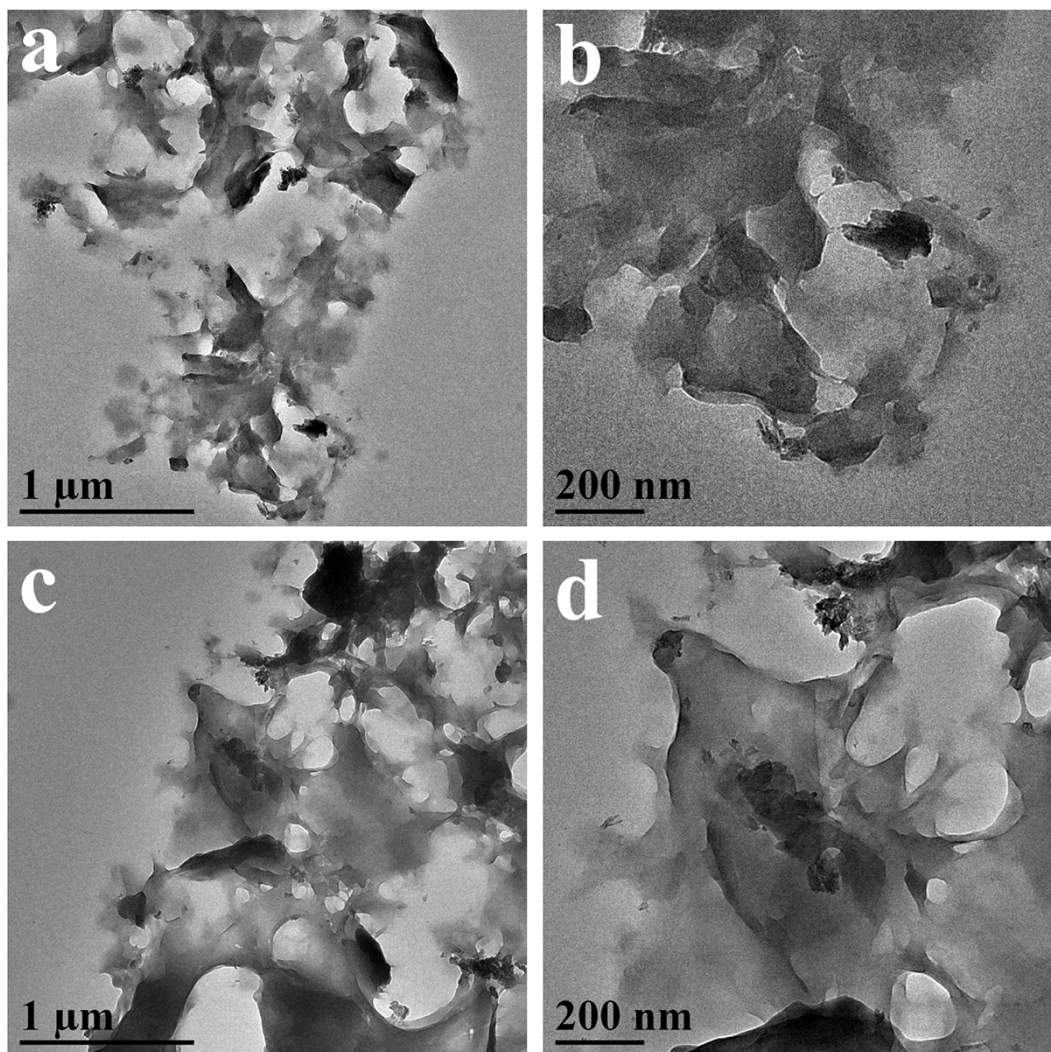

**Fig. S2** Low- and high- magnification TEM images of the precursors obtained after microwave heating 1 mL ChCl/OA DES with 7.0 mg  $\text{Mn}(\text{NO}_3)_2 \cdot 4\text{H}_2\text{O}$  and 33 mg  $\text{NiCl}_2 \cdot 6\text{H}_2\text{O}$ . This obtained precursor will be used for synthesizing  $\text{Mn-5Ni}_2\text{P}$ .

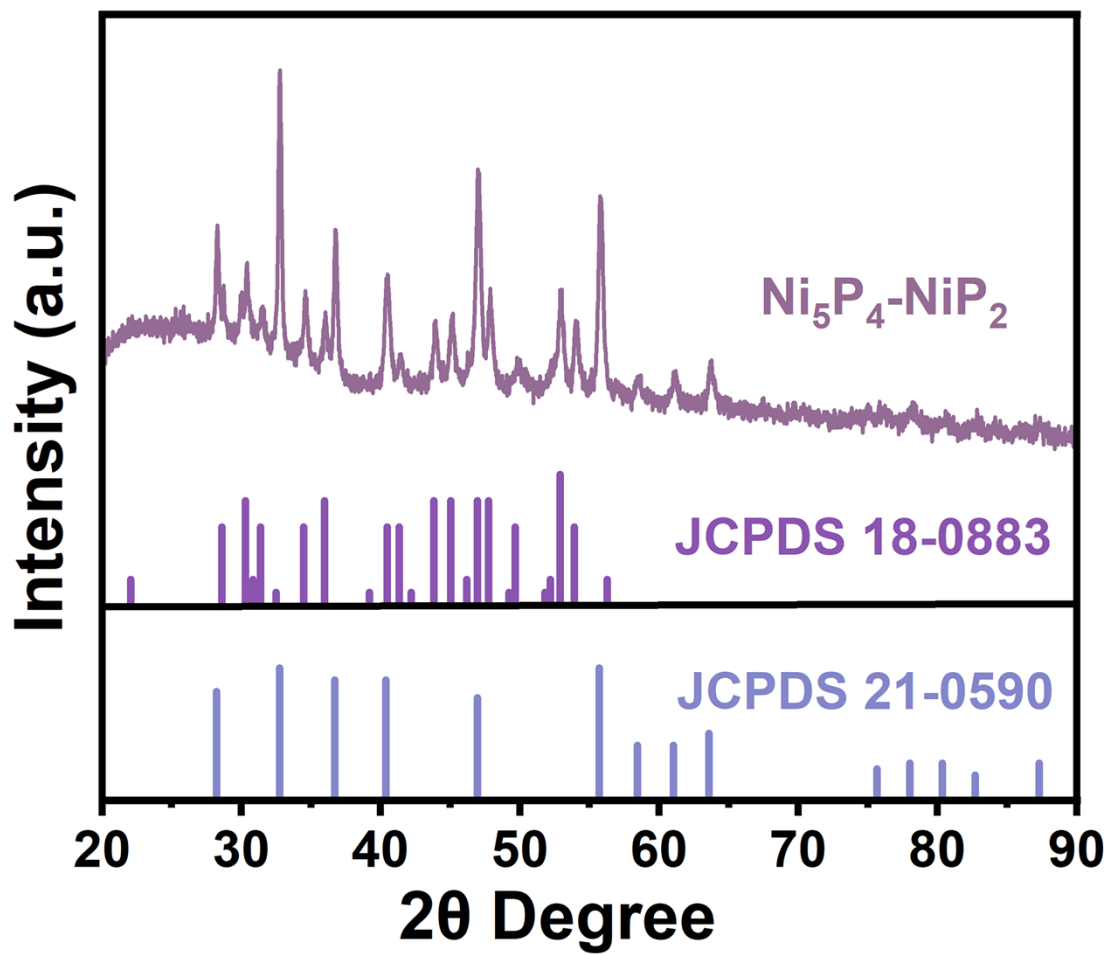

Fig. S3 XRD pattern of the synthesized  $\text{Ni}_x\text{P}$ .



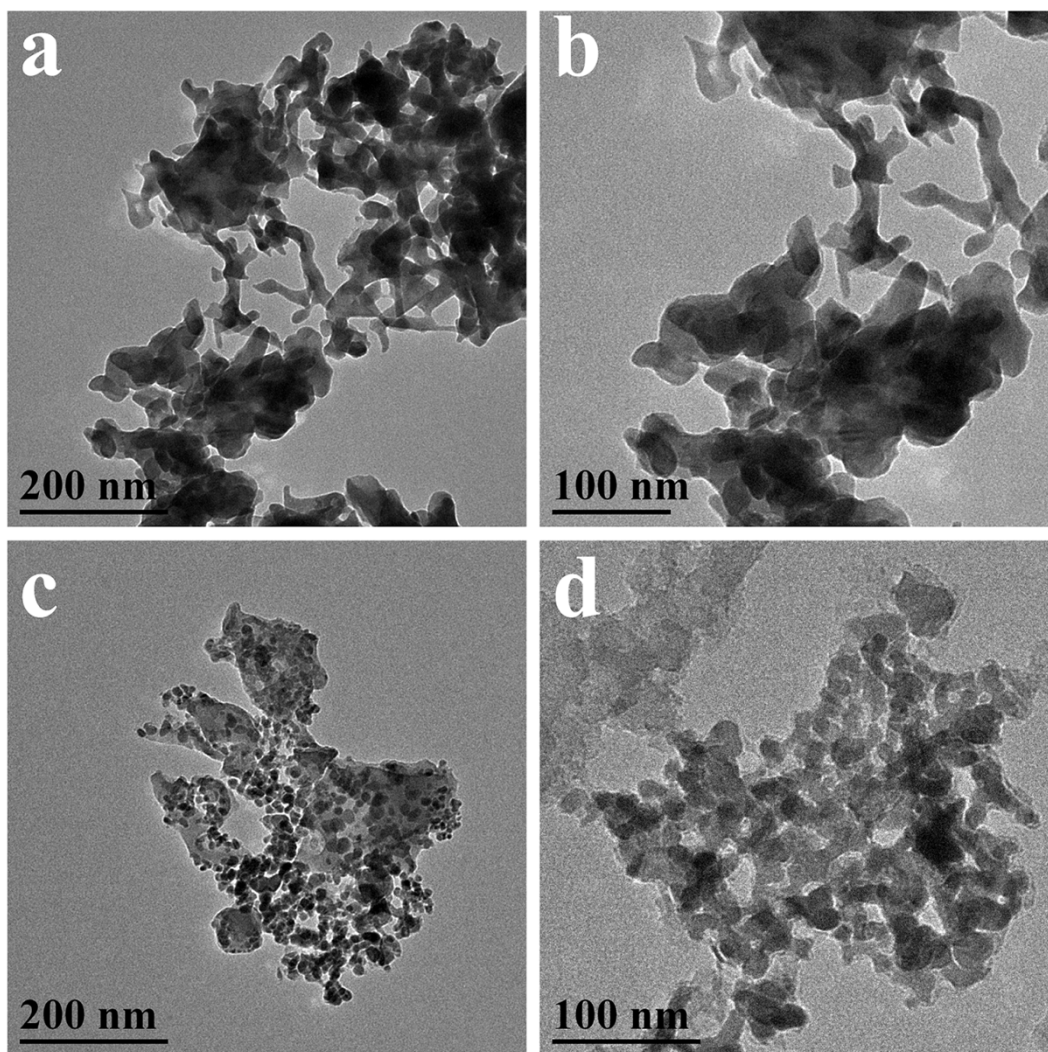

**Fig. S4** TEM images of the synthesized (a, b)  $\text{Ni}_x\text{P}$ , (c)  $\text{Mn-3Ni}_2\text{P}$ , (d)  $\text{Mn-7Ni}_2\text{P}$ .

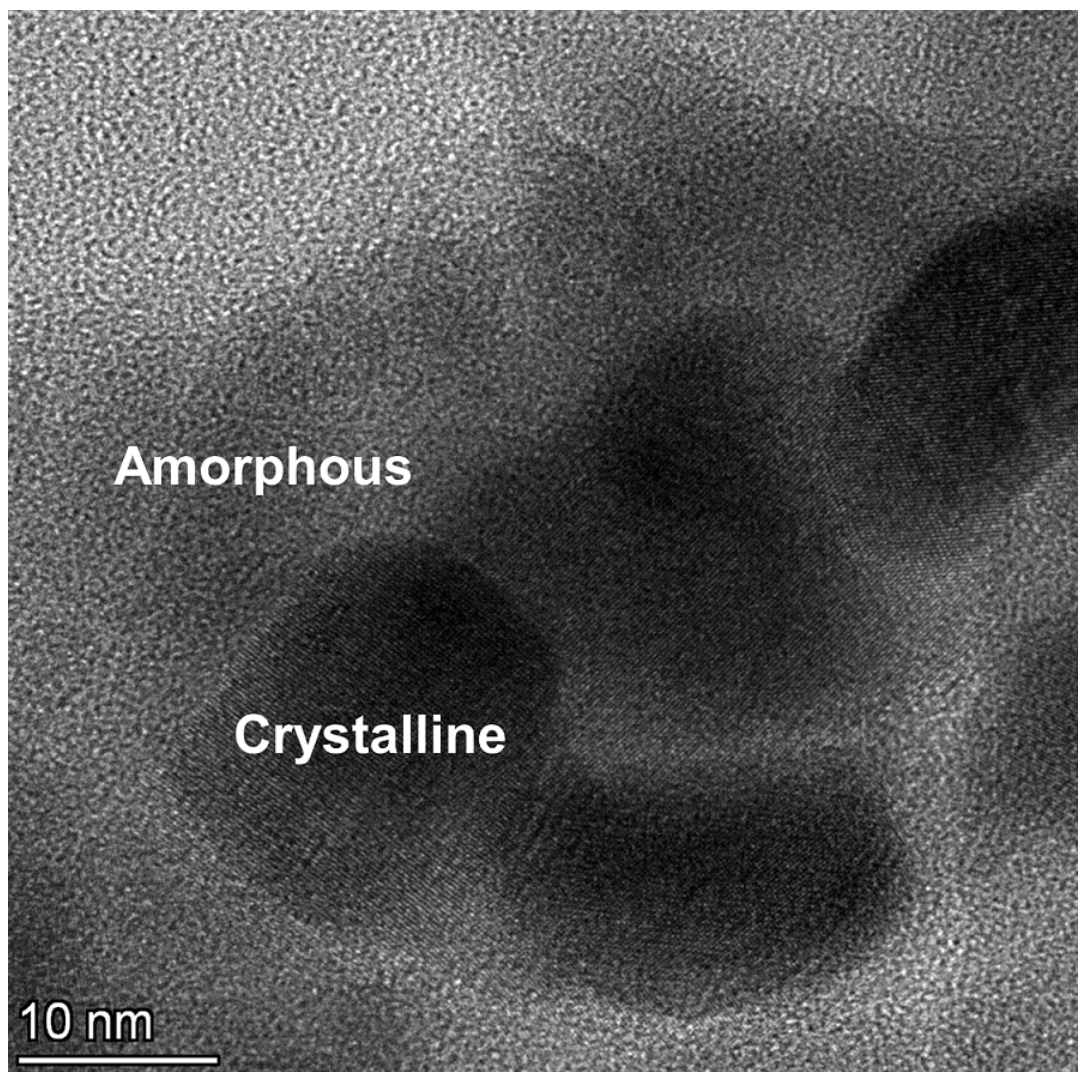

**Fig. S5** HRTEM image of Mn-5Ni<sub>2</sub>P.

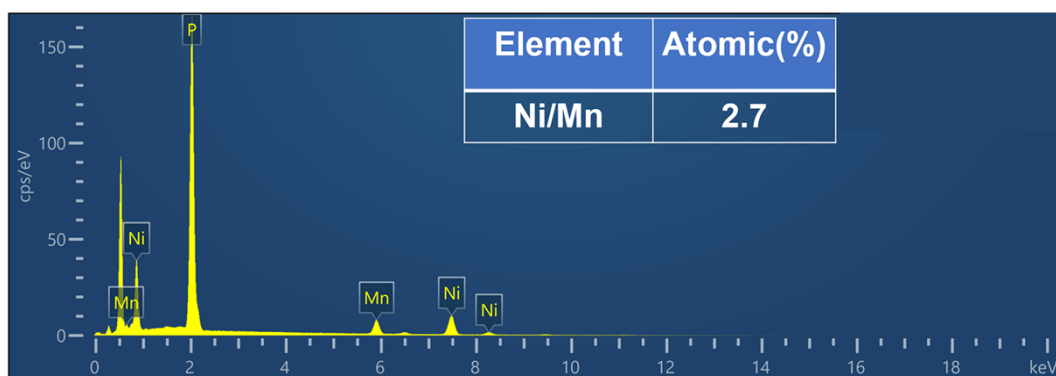

**Fig. S6** EDX spectrum of Mn-3Ni<sub>2</sub>P which was synthesized from the precursor obtained after microwave heating 1 mL ChCl/OA DES with 10.4 mg Mn(NO<sub>3</sub>)<sub>2</sub>·4H<sub>2</sub>O and 29.6 mg NiCl<sub>2</sub>·6H<sub>2</sub>O.

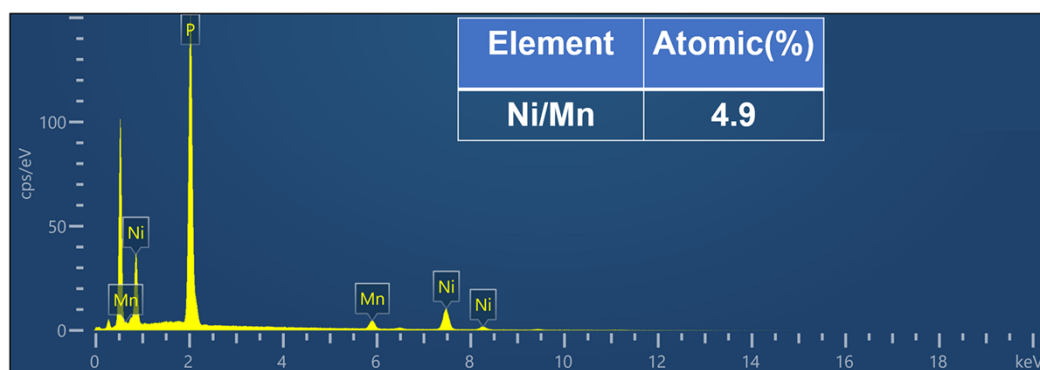

**Fig. S7** EDX spectrum of Mn-5Ni<sub>2</sub>P which was synthesized from the precursor obtained after microwave heating 1 mL ChCl/OA DES with 7.0 mg Mn(NO<sub>3</sub>)<sub>2</sub>·4H<sub>2</sub>O and 33 mg NiCl<sub>2</sub>·6H<sub>2</sub>O.

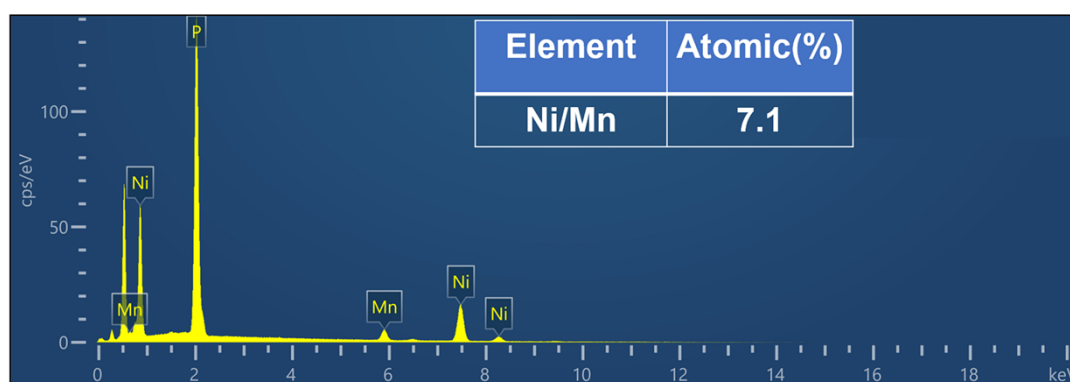

**Fig. S8** EDX spectrum of Mn-7Ni<sub>2</sub>P which was synthesized from the precursor obtained after microwave heating 1 mL ChCl/OA DES with 5.2 mg Mn(NO<sub>3</sub>)<sub>2</sub>·4H<sub>2</sub>O

and 34.8 mg  $\text{NiCl}_2 \cdot 6\text{H}_2\text{O}$ .

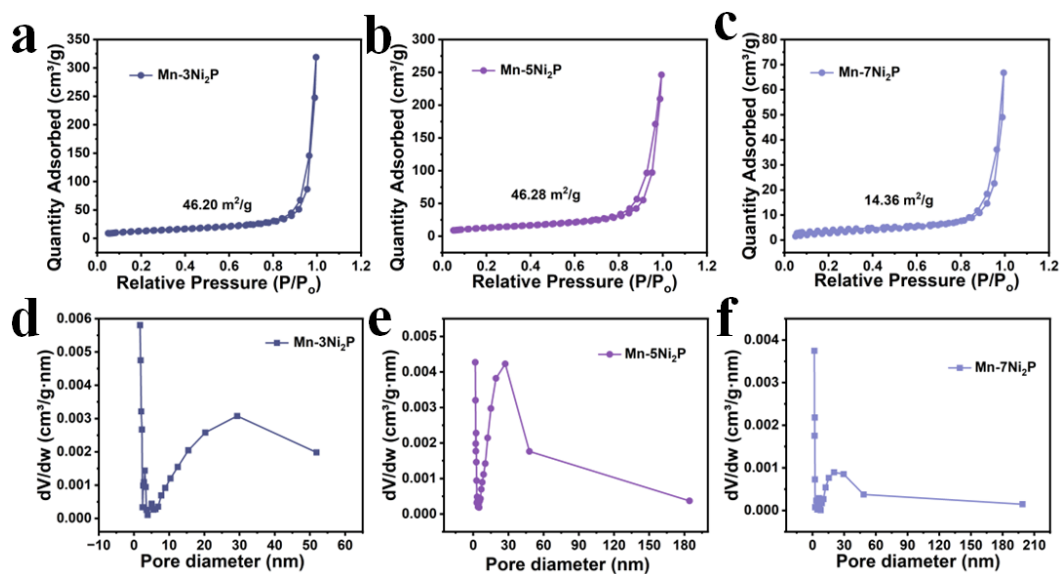

**Fig. S9**  $\text{N}_2$  adsorption-desorption isotherms of (a) Mn-3Ni<sub>2</sub>P, (b) Mn-5Ni<sub>2</sub>P, (c) Mn-7Ni<sub>2</sub>P. Pore size distributions of the synthesized (d) Mn-3Ni<sub>2</sub>P, (e) Mn-5Ni<sub>2</sub>P, (f) Mn-7Ni<sub>2</sub>P.

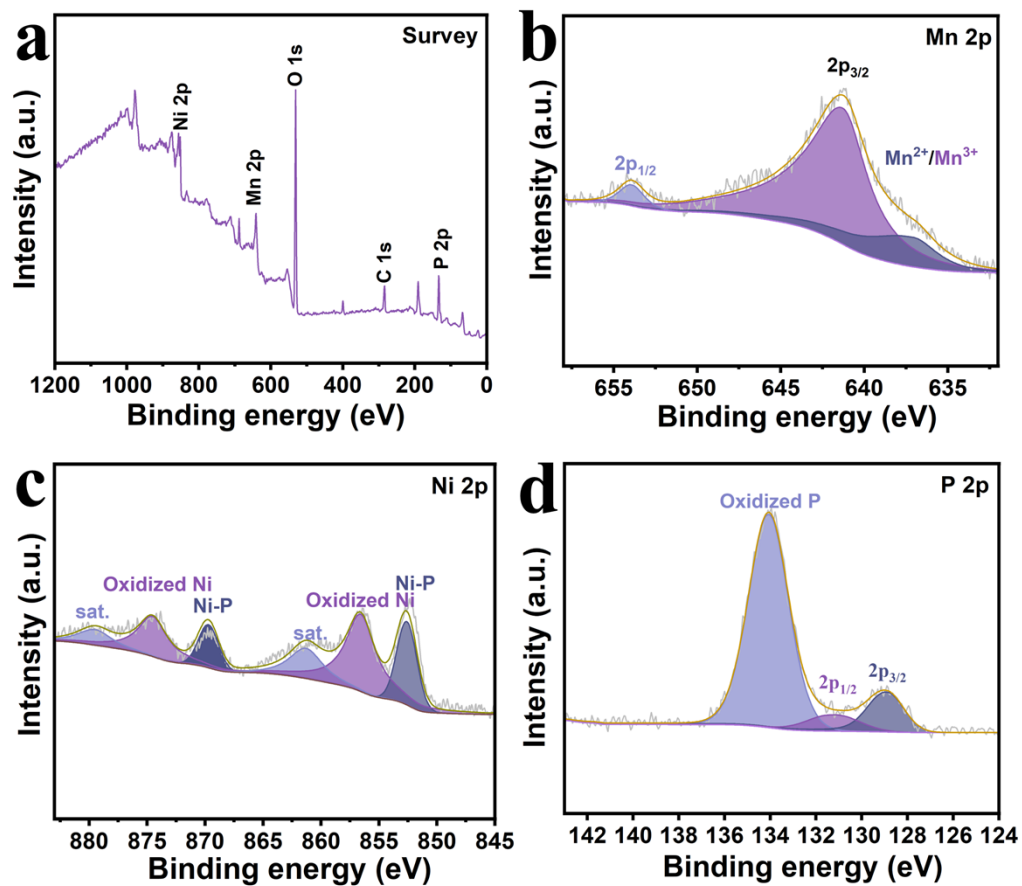

**Fig. S10** (a) XPS survey spectrum of Mn-5Ni<sub>2</sub>P. High-resolution XPS spectra of (b) Mn 2p, (c) Ni 2p, (d) P 2p for the Mn-5Ni<sub>2</sub>P.

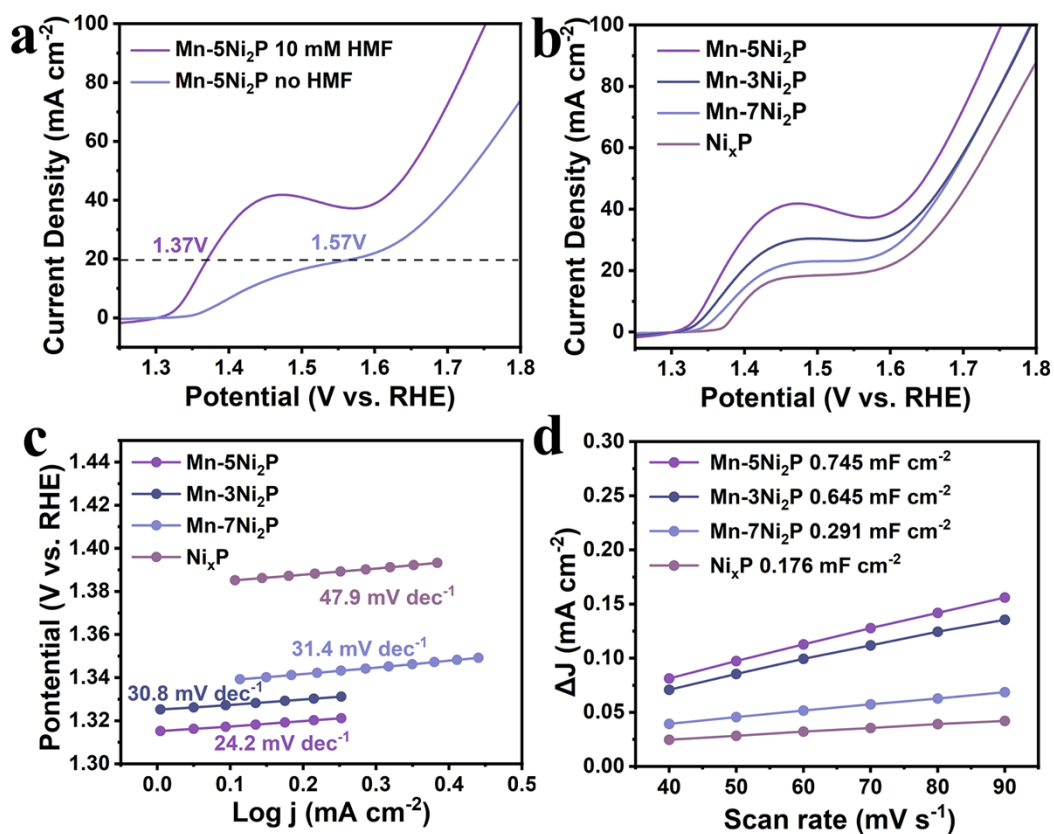

**Fig. S11** (a) LSV curves of Mn-5Ni<sub>2</sub>P in 1.0 M KOH with and without 10 mM HMF. (b) LSV curves (c) Tafel plots, and (d) electrochemical double layer capacitance (Cdl) of Ni<sub>x</sub>P, Mn-3Ni<sub>2</sub>P, Mn-5Ni<sub>2</sub>P and Mn-7Ni<sub>2</sub>P in 1.0 M KOH with 10 mM HMF.

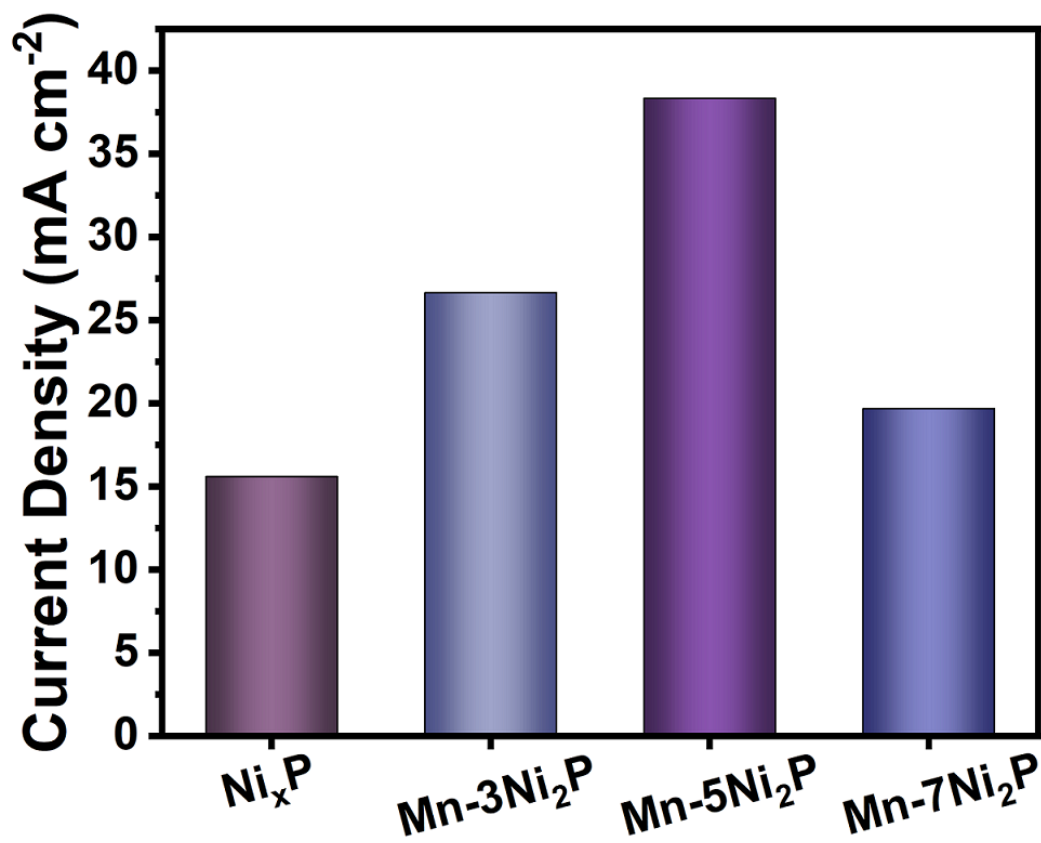

Fig. S12 Corresponding current densities at 1.43 V in 1 M KOH with 10 mM HMF.

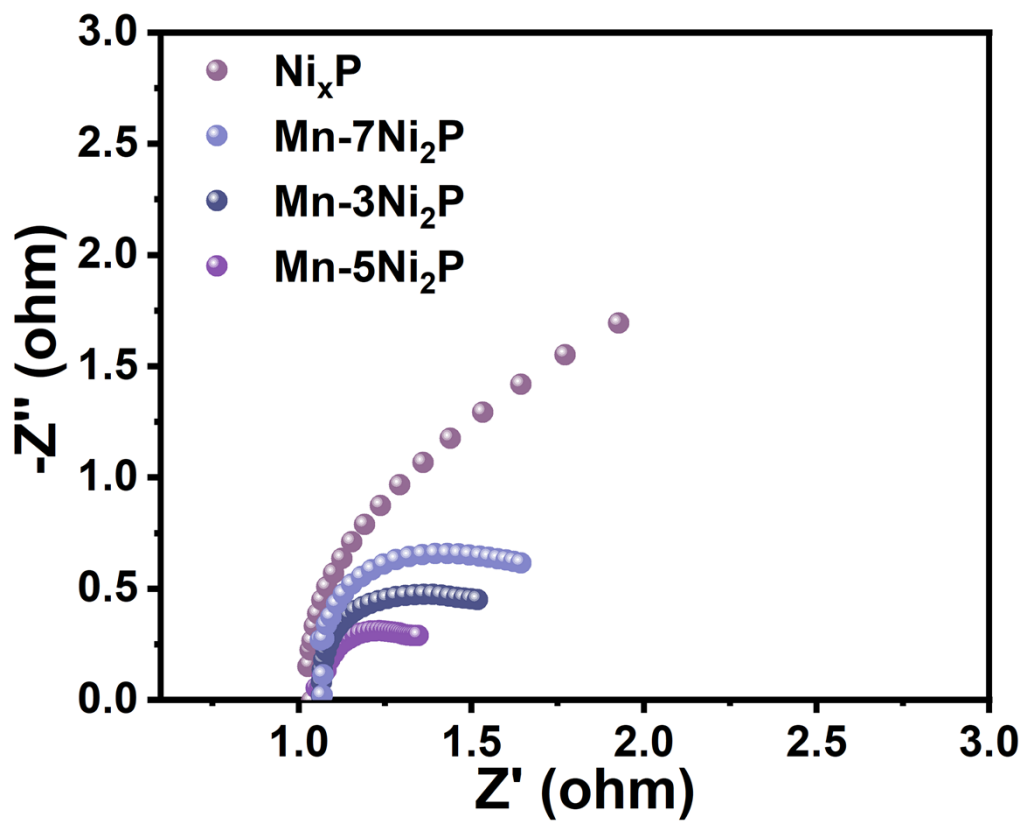

Fig. S13 Electrochemical impedance spectra of different catalysts at 1.43 V.



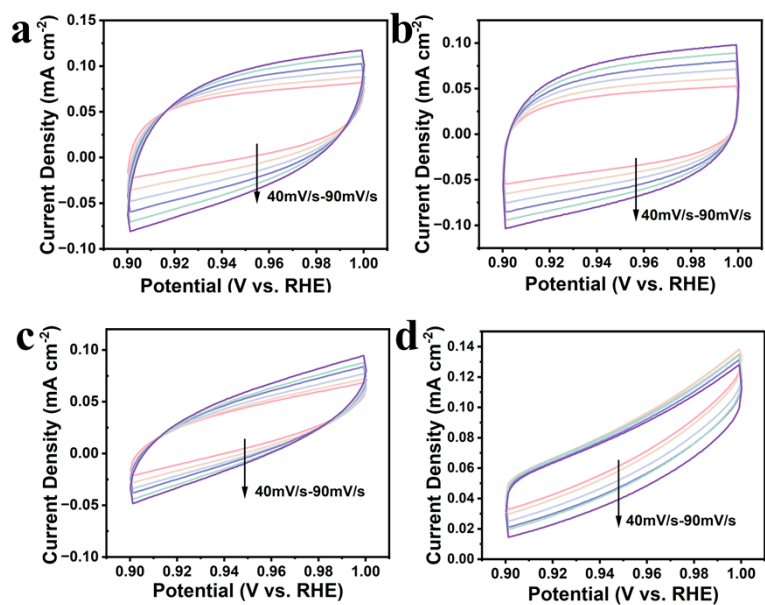

**Fig. S14** Cyclic voltammograms of (a) Mn-3Ni<sub>2</sub>P, (b) Mn-5Ni<sub>2</sub>P, (c) Mn-7Ni<sub>2</sub>P, and (d) Ni<sub>x</sub>P at different scan rates.

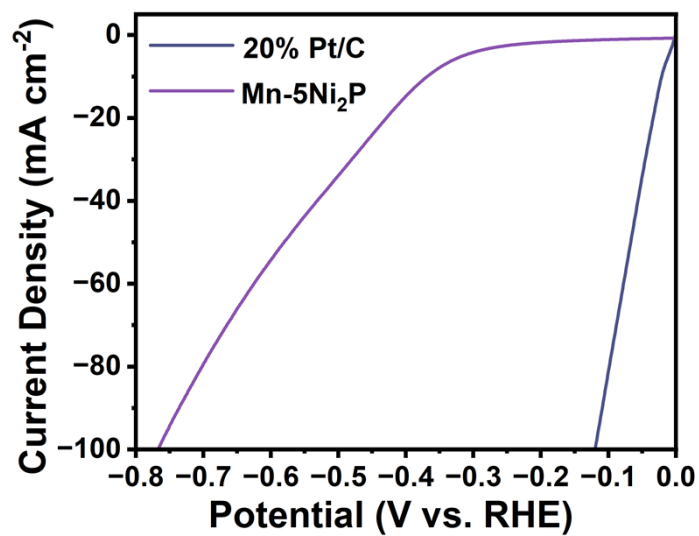

**Fig. S15** LSV curves of Mn-5Ni<sub>2</sub>P and 20% Pt/C for HER in 1.0 M KOH.

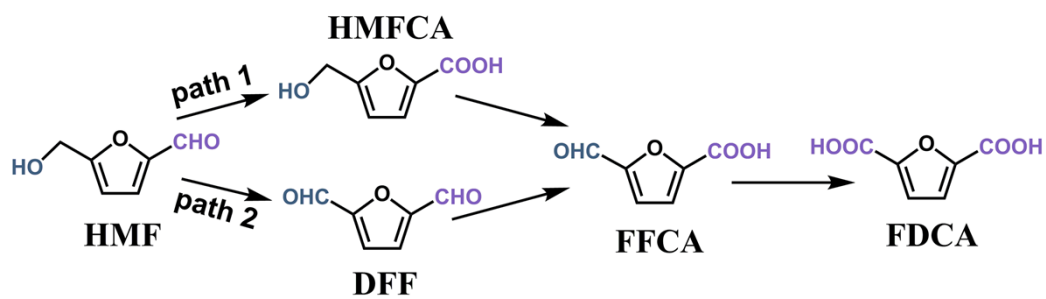

**Fig. S16** Possible pathways for the oxidation of HMF to FDCA.

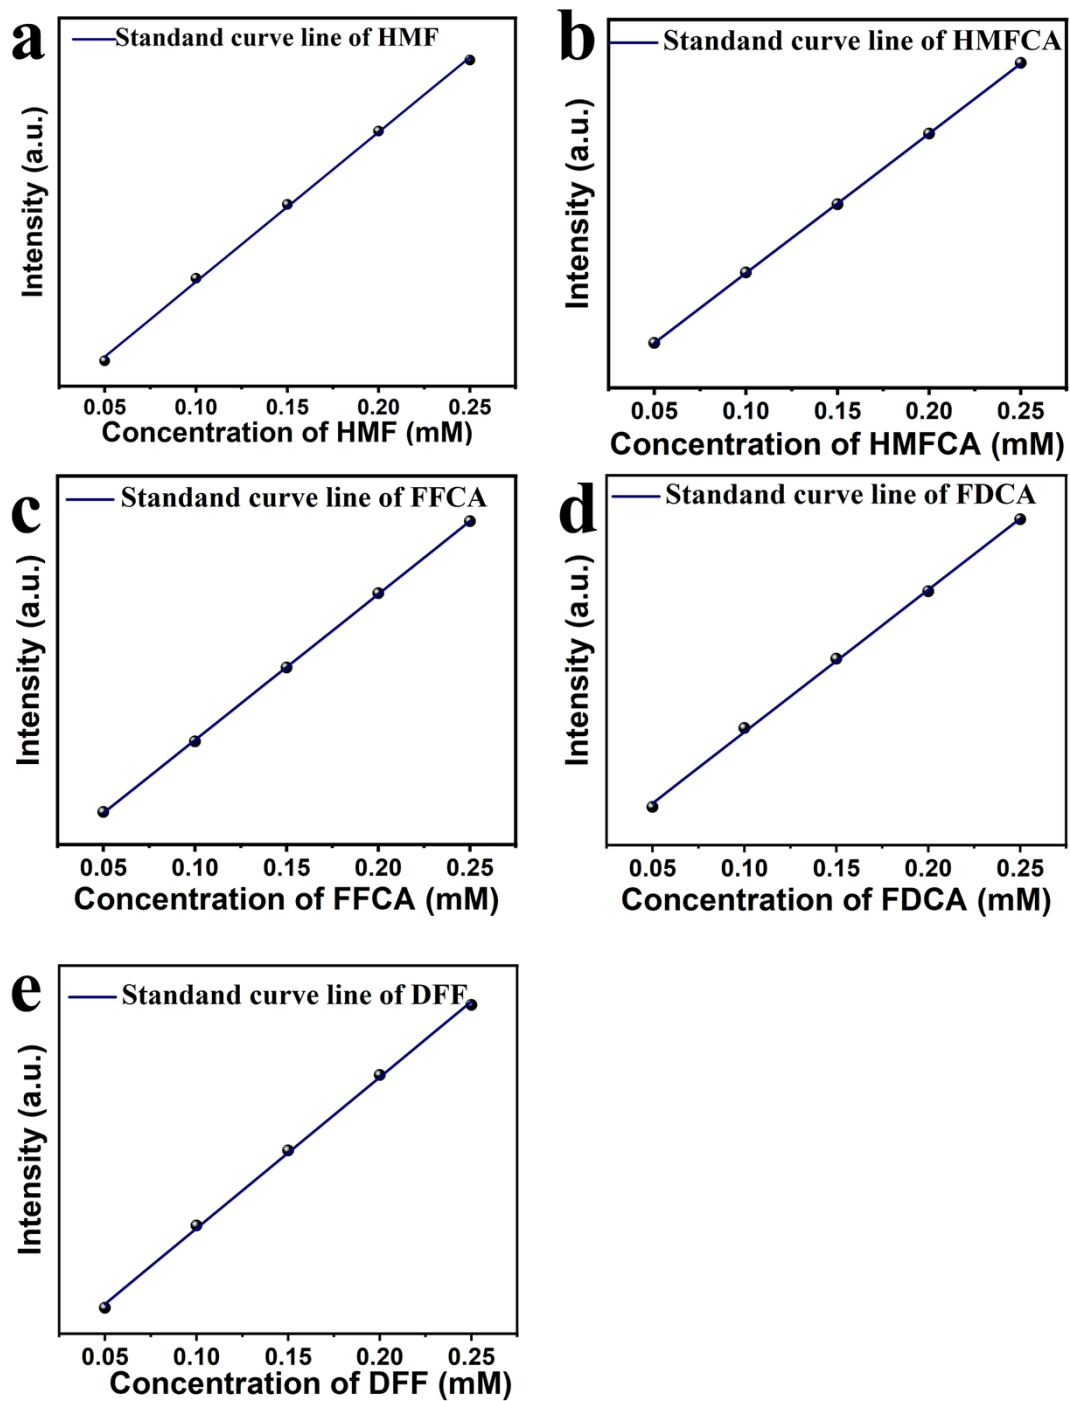

**Fig. S17** Standard curves of the HPLC for (a) HMF, (b) HMFCFA, (c) FFCA, (d) FDCA, and (e) DFF.

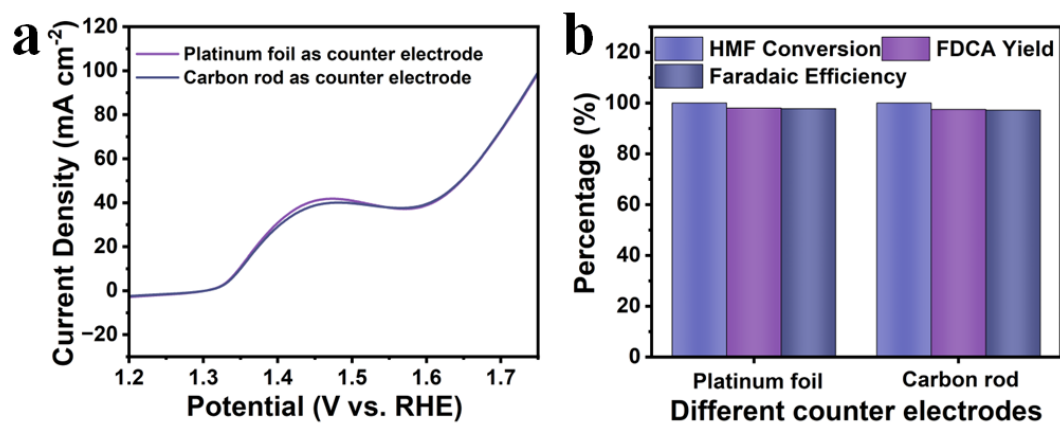

**Fig. S18** (a) LSV curves, (b) HMF electrooxidation performance of Mn-5Ni<sub>2</sub>P in 1.0 M KOH with 10 mM HMF using platinum foil and carbon rod as counter electrodes, respectively.

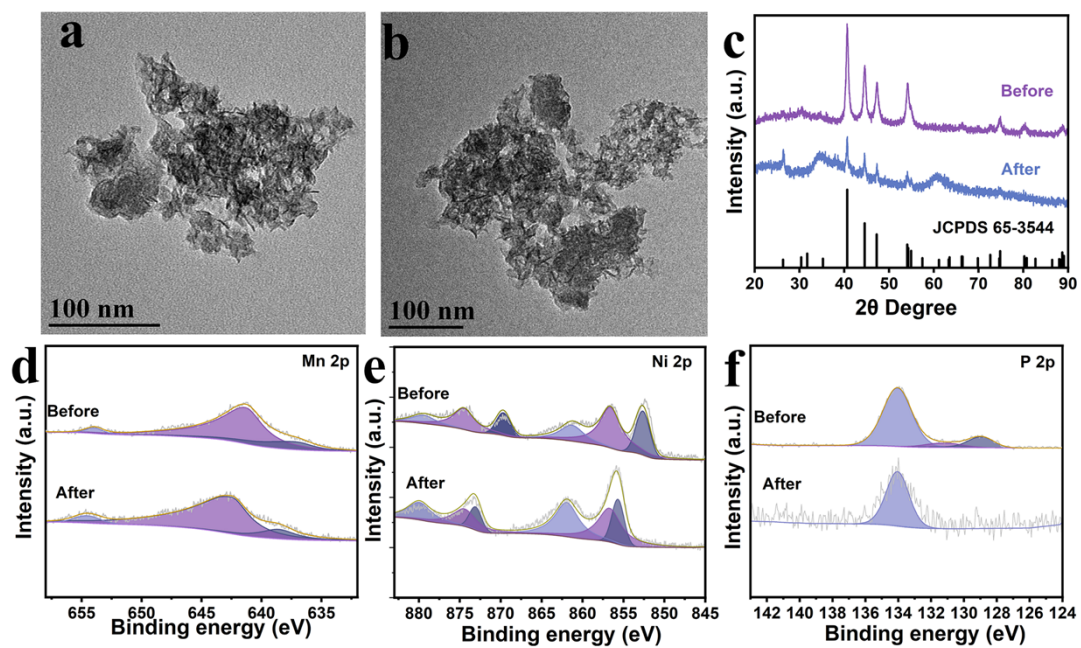

**Fig. S19** (a, b) TEM images of Mn-5Ni<sub>2</sub>P after four electrolysis cycles. (c) XRD patterns, XPS spectra of (d) Mn 2p, (e) Ni 2p, (f) P 2p of Mn-5Ni<sub>2</sub>P before and after four electrolysis cycles.

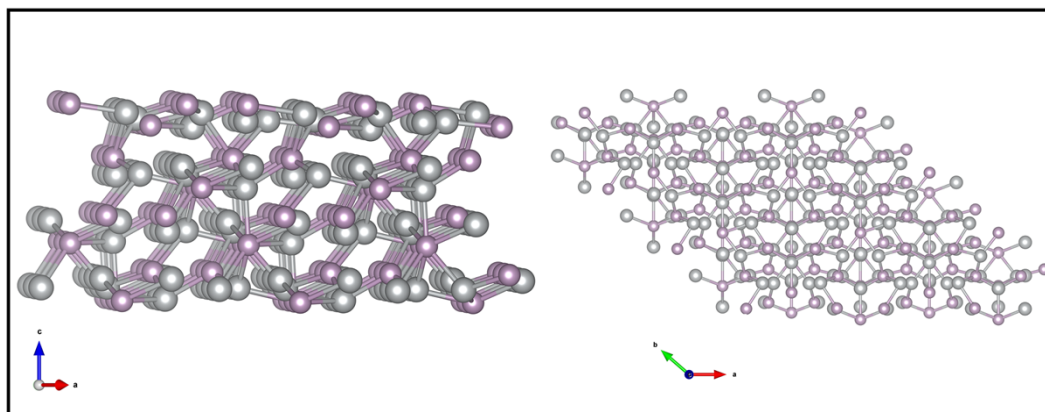

**Fig. S20** Side and top views of an optimized structure for the Ni<sub>2</sub>P (111) surface.

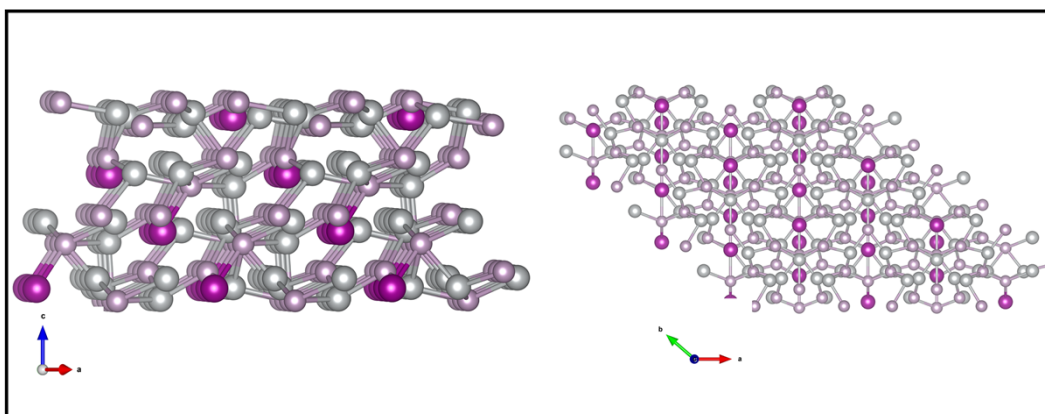

**Fig. S21** Side and top views of an optimized structure for the Mn-5Ni<sub>2</sub>P (111) surface.

**Table S1** Comparison of Mn-5Ni<sub>2</sub>P with recently reported catalysts toward HMF electrooxidation.

| Catalysts                              | C <sub>HMF</sub> (mM) | Potential (V vs. RHE) | Conversion (%) | FDCA Yield (%) | FE (%)      | Reference        |
|----------------------------------------|-----------------------|-----------------------|----------------|----------------|-------------|------------------|
| <b>Mn-5Ni<sub>2</sub>P</b>             | <b>10</b>             | <b>1.43</b>           | <b>100</b>     | <b>98.0</b>    | <b>97.8</b> | <b>This work</b> |
| NiMo <sub>3</sub> S <sub>4</sub> -R    | 10                    | 1.45                  | 99.3           | 98.7           | 98.5        | 6                |
| Co <sub>3</sub> O <sub>4</sub> /CF     | 10                    | 1.40                  | 100            | 94.9           | 94.6        | 7                |
| CoP/Ni <sub>2</sub> P-NiCoP@-600       | 10                    | 1.45                  | ~100           | 98.1           | 97.9        | 8                |
| F-NiCo <sub>2</sub> O <sub>4</sub>     | 10                    | 1.47                  | ~              | 97             | 96.5        | 9                |
| 5.2%Ce-CoP                             | 10                    | 1.44                  | 100            | 98             | 96.4        | 10               |
| MoO <sub>2</sub> -FeP@C                | 10                    | 1.424                 | 99.4           | 98.6           | 97.8        | 11               |
| Mo-Ni <sub>0.85</sub> Se               | 10                    | 1.40                  | ~100           | 91-95          | 95          | 12               |
| NiS <sub>x</sub> /Ni <sub>2</sub> P    | 10                    | 1.46                  | ~100           | 98.5           | 95.1        | 13               |
| Co <sub>0.4</sub> NiS                  | 10                    | 1.45                  | ~100           | ~100           | 99.1        | 14               |
| NF@Co <sub>3</sub> O <sub>4</sub> /CeO | 10                    | 1.40                  | 98.0           | 94.5           | 97.5        | 15               |
| NiCo <sub>2</sub> O <sub>4</sub>       | 5                     | 1.5                   | 99.6           | 90.8           | 87.5        | 16               |

**Table S2** Adsorption energy of HMF on different surfaces.

| Adsorbed sites                   | $G_{\text{total}}$ | $G_{\text{sub}}$ | $G_{\text{mol}}$ | $\Delta G$ |
|----------------------------------|--------------------|------------------|------------------|------------|
| Ni <sub>2</sub> P*HMF            | -1337.139          | -1244.948        | -91.97799        | -0.213066  |
| Mn-Ni <sub>2</sub> P<br>(Ni)*HMF | -1423.815          | -1331.605        | -91.97799        | -0.231957  |
| Mn-Ni <sub>2</sub> P<br>(Mn)*HMF | -1424.003          | -1331.605        | -91.97799        | -0.420213  |

\*Where G represents the corrected free energy,  $G_{\text{total}}$  is the total free energy of HMF adsorbed on Ni<sub>2</sub>P or Mn-Ni<sub>2</sub>P substrates ( Mn site or Ni site ) ,  $G_{\text{mol}}$  and  $G_{\text{sub}}$  are the free energies of individual HMF molecules and substrates, respectively.



**Table S3** Unit-cell and position parameters of Ni<sub>2</sub>P optimization model.

| <b>Ni<sub>2</sub>P</b>      |                 |                 |                 |
|-----------------------------|-----------------|-----------------|-----------------|
| <i>a</i> (Å)                | 20.56060        |                 |                 |
| <i>b</i> (Å)                | 20.39730        |                 |                 |
| <i>c</i> (Å)                | 25.00000        |                 |                 |
| $\alpha$ (deg)              | 90.00000        |                 |                 |
| $\beta$ (deg)               | 90.00000        |                 |                 |
| $\gamma$ (deg)              | 139.11300       |                 |                 |
| <b>Atom<br/>Coordinates</b> | <b><i>x</i></b> | <b><i>y</i></b> | <b><i>z</i></b> |
| Ni1                         | 0.16448         | 0.26031         | 0.05450         |
| Ni2                         | 0.02565         | 0.07519         | 0.14296         |
| Ni3                         | 0.38618         | 0.22355         | 0.22991         |
| Ni4                         | 0.25288         | 0.03498         | 0.31323         |
| Ni5                         | 0.29794         | 0.23500         | 0.03939         |
| Ni6                         | 0.15910         | 0.04988         | 0.12786         |
| Ni7                         | 0.02008         | 0.19595         | 0.21471         |
| Ni8                         | 0.37577         | 0.00461         | 0.30150         |
| Ni9                         | 0.46936         | 0.26031         | 0.05450         |
| Ni10                        | 0.33052         | 0.07519         | 0.14296         |
| Ni11                        | 0.19343         | 0.22456         | 0.22998         |
| Ni12                        | 0.04145         | 0.03291         | 0.31332         |
| Ni13                        | 0.49101         | 0.07053         | 0.04070         |
| Ni14                        | 0.35217         | 0.21874         | 0.12916         |
| Ni15                        | 0.21106         | 0.03288         | 0.21755         |

---

|      |         |         |         |
|------|---------|---------|---------|
| Ni16 | 0.07637 | 0.18536 | 0.30361 |
| Ni17 | 0.15203 | 0.04046 | 0.02275 |
| Ni18 | 0.01319 | 0.18867 | 0.11122 |
| Ni19 | 0.37442 | 0.00335 | 0.19716 |
| Ni20 | 0.23250 | 0.14805 | 0.29071 |
| Ni21 | 0.35816 | 0.07053 | 0.04070 |
| Ni22 | 0.21932 | 0.21874 | 0.12916 |
| Ni23 | 0.08104 | 0.03280 | 0.21738 |
| Ni24 | 0.44583 | 0.18520 | 0.30239 |
| Ni25 | 0.66448 | 0.26031 | 0.05450 |
| Ni26 | 0.52565 | 0.07519 | 0.14296 |
| Ni27 | 0.88618 | 0.22355 | 0.22991 |
| Ni28 | 0.75288 | 0.03498 | 0.31323 |
| Ni29 | 0.79794 | 0.23500 | 0.03939 |
| Ni30 | 0.65910 | 0.04988 | 0.12786 |
| Ni31 | 0.52008 | 0.19595 | 0.21471 |
| Ni32 | 0.87577 | 0.00461 | 0.30150 |
| Ni33 | 0.96936 | 0.26031 | 0.05450 |
| Ni34 | 0.83052 | 0.07519 | 0.14296 |
| Ni35 | 0.69343 | 0.22456 | 0.22998 |
| Ni36 | 0.54145 | 0.03291 | 0.31332 |
| Ni37 | 0.99101 | 0.07053 | 0.04070 |
| Ni38 | 0.85217 | 0.21874 | 0.12916 |
| Ni39 | 0.71106 | 0.03288 | 0.21755 |
| Ni40 | 0.57637 | 0.18536 | 0.30361 |

---

---

|      |         |         |         |
|------|---------|---------|---------|
| Ni41 | 0.65203 | 0.04046 | 0.02275 |
| Ni42 | 0.51319 | 0.18867 | 0.11122 |
| Ni43 | 0.87442 | 0.00335 | 0.19716 |
| Ni44 | 0.73250 | 0.14805 | 0.29071 |
| Ni45 | 0.85816 | 0.07053 | 0.04070 |
| Ni46 | 0.71932 | 0.21874 | 0.12916 |
| Ni47 | 0.58104 | 0.03280 | 0.21738 |
| Ni48 | 0.94583 | 0.18520 | 0.30239 |
| Ni49 | 0.16448 | 0.59364 | 0.05450 |
| Ni50 | 0.02565 | 0.40852 | 0.14296 |
| Ni51 | 0.38529 | 0.55569 | 0.22968 |
| Ni52 | 0.25264 | 0.36811 | 0.31333 |
| Ni53 | 0.29794 | 0.56833 | 0.03939 |
| Ni54 | 0.15910 | 0.38322 | 0.12786 |
| Ni55 | 0.02036 | 0.52948 | 0.21474 |
| Ni56 | 0.37662 | 0.33834 | 0.30150 |
| Ni57 | 0.46936 | 0.59364 | 0.05450 |
| Ni58 | 0.33052 | 0.40852 | 0.14296 |
| Ni59 | 0.19278 | 0.55719 | 0.23017 |
| Ni60 | 0.04142 | 0.36635 | 0.31338 |
| Ni61 | 0.49101 | 0.40386 | 0.04070 |
| Ni62 | 0.35217 | 0.55208 | 0.12916 |
| Ni63 | 0.21054 | 0.36589 | 0.21762 |
| Ni64 | 0.07635 | 0.51899 | 0.30375 |
| Ni65 | 0.15203 | 0.37379 | 0.02275 |

---

---

|      |         |         |         |
|------|---------|---------|---------|
| Ni66 | 0.01319 | 0.52200 | 0.11122 |
| Ni67 | 0.37395 | 0.33612 | 0.19724 |
| Ni68 | 0.23184 | 0.48054 | 0.29100 |
| Ni69 | 0.35816 | 0.40386 | 0.04070 |
| Ni70 | 0.21932 | 0.55208 | 0.12916 |
| Ni71 | 0.08053 | 0.36564 | 0.21748 |
| Ni72 | 0.44599 | 0.51889 | 0.30242 |
| Ni73 | 0.66448 | 0.59364 | 0.05450 |
| Ni74 | 0.52565 | 0.40852 | 0.14296 |
| Ni75 | 0.88529 | 0.55569 | 0.22968 |
| Ni76 | 0.75264 | 0.36811 | 0.31333 |
| Ni77 | 0.79794 | 0.56833 | 0.03939 |
| Ni78 | 0.65910 | 0.38322 | 0.12786 |
| Ni79 | 0.52036 | 0.52948 | 0.21474 |
| Ni80 | 0.87662 | 0.33834 | 0.30150 |
| Ni81 | 0.96936 | 0.59364 | 0.05450 |
| Ni82 | 0.83052 | 0.40852 | 0.14296 |
| Ni83 | 0.69278 | 0.55719 | 0.23017 |
| Ni84 | 0.54142 | 0.36635 | 0.31338 |
| Ni85 | 0.99101 | 0.40386 | 0.04070 |
| Ni86 | 0.85217 | 0.55208 | 0.12916 |
| Ni87 | 0.71054 | 0.36589 | 0.21762 |
| Ni88 | 0.57635 | 0.51899 | 0.30375 |
| Ni89 | 0.65203 | 0.37379 | 0.02275 |
| Ni90 | 0.51319 | 0.52200 | 0.11122 |

---

---

|       |         |         |         |
|-------|---------|---------|---------|
| Ni91  | 0.87395 | 0.33612 | 0.19724 |
| Ni92  | 0.73184 | 0.48054 | 0.29100 |
| Ni93  | 0.85816 | 0.40386 | 0.04070 |
| Ni94  | 0.71932 | 0.55208 | 0.12916 |
| Ni95  | 0.58053 | 0.36564 | 0.21748 |
| Ni96  | 0.94599 | 0.51889 | 0.30242 |
| Ni97  | 0.16448 | 0.92698 | 0.05450 |
| Ni98  | 0.02565 | 0.74186 | 0.14296 |
| Ni99  | 0.38617 | 0.89035 | 0.22998 |
| Ni100 | 0.25283 | 0.70122 | 0.31329 |
| Ni101 | 0.29794 | 0.90167 | 0.03939 |
| Ni102 | 0.15910 | 0.71655 | 0.12786 |
| Ni103 | 0.02042 | 0.86322 | 0.21488 |
| Ni104 | 0.37568 | 0.67072 | 0.30144 |
| Ni105 | 0.46936 | 0.92698 | 0.05450 |
| Ni106 | 0.33052 | 0.74186 | 0.14296 |
| Ni107 | 0.19319 | 0.89107 | 0.23002 |
| Ni108 | 0.04126 | 0.69929 | 0.31346 |
| Ni109 | 0.49101 | 0.73719 | 0.04070 |
| Ni110 | 0.35217 | 0.88541 | 0.12916 |
| Ni111 | 0.21093 | 0.69944 | 0.21776 |
| Ni112 | 0.07674 | 0.85233 | 0.30335 |
| Ni113 | 0.15203 | 0.70712 | 0.02275 |
| Ni114 | 0.01319 | 0.85534 | 0.11122 |
| Ni115 | 0.37436 | 0.66991 | 0.19750 |

---

---

|       |         |         |         |
|-------|---------|---------|---------|
| Ni116 | 0.23248 | 0.81460 | 0.29119 |
| Ni117 | 0.35816 | 0.73719 | 0.04070 |
| Ni118 | 0.21932 | 0.88541 | 0.12916 |
| Ni119 | 0.08097 | 0.69929 | 0.21753 |
| Ni120 | 0.44607 | 0.85234 | 0.30254 |
| Ni121 | 0.66448 | 0.92698 | 0.05450 |
| Ni122 | 0.52565 | 0.74186 | 0.14296 |
| Ni123 | 0.88617 | 0.89035 | 0.22998 |
| Ni124 | 0.75283 | 0.70122 | 0.31329 |
| Ni125 | 0.79794 | 0.90167 | 0.03939 |
| Ni126 | 0.65910 | 0.71655 | 0.12786 |
| Ni127 | 0.52042 | 0.86322 | 0.21488 |
| Ni128 | 0.87568 | 0.67072 | 0.30144 |
| Ni129 | 0.96936 | 0.92698 | 0.05450 |
| Ni130 | 0.83052 | 0.74186 | 0.14296 |
| Ni131 | 0.69319 | 0.89107 | 0.23002 |
| Ni132 | 0.54126 | 0.69929 | 0.31346 |
| Ni133 | 0.99101 | 0.73719 | 0.04070 |
| Ni134 | 0.85217 | 0.88541 | 0.12916 |
| Ni135 | 0.71093 | 0.69944 | 0.21776 |
| Ni136 | 0.57674 | 0.85233 | 0.30335 |
| Ni137 | 0.65203 | 0.70712 | 0.02275 |
| Ni138 | 0.51319 | 0.85534 | 0.11122 |
| Ni139 | 0.87436 | 0.66991 | 0.19750 |
| Ni140 | 0.73248 | 0.81460 | 0.29119 |

---

---

|       |         |         |         |
|-------|---------|---------|---------|
| Ni141 | 0.85816 | 0.73719 | 0.04070 |
| Ni142 | 0.71932 | 0.88541 | 0.12916 |
| Ni143 | 0.58097 | 0.69929 | 0.21753 |
| Ni144 | 0.94607 | 0.85234 | 0.30254 |
| P1    | 0.02354 | 0.20247 | 0.01998 |
| P2    | 0.38470 | 0.01735 | 0.10844 |
| P3    | 0.24465 | 0.16413 | 0.19731 |
| P4    | 0.10746 | 0.31358 | 0.29356 |
| P5    | 0.28746 | 0.10991 | 0.06421 |
| P6    | 0.14862 | 0.25812 | 0.15267 |
| P7    | 0.00811 | 0.07257 | 0.24240 |
| P8    | 0.37573 | 0.22361 | 0.32657 |
| P9    | 0.12079 | 0.10991 | 0.06421 |
| P10   | 0.48195 | 0.25812 | 0.15267 |
| P11   | 0.34367 | 0.07168 | 0.24189 |
| P12   | 0.20640 | 0.22678 | 0.32606 |
| P13   | 0.52354 | 0.20247 | 0.01998 |
| P14   | 0.88470 | 0.01735 | 0.10844 |
| P15   | 0.74465 | 0.16413 | 0.19731 |
| P16   | 0.60746 | 0.31358 | 0.29356 |
| P17   | 0.78746 | 0.10991 | 0.06421 |
| P18   | 0.64862 | 0.25812 | 0.15267 |
| P19   | 0.50811 | 0.07257 | 0.24240 |
| P20   | 0.87573 | 0.22361 | 0.32657 |
| P21   | 0.62079 | 0.10991 | 0.06421 |

---

---

|     |         |         |         |
|-----|---------|---------|---------|
| P22 | 0.98195 | 0.25812 | 0.15267 |
| P23 | 0.84367 | 0.07168 | 0.24189 |
| P24 | 0.70640 | 0.22678 | 0.32606 |
| P25 | 0.02354 | 0.53580 | 0.01998 |
| P26 | 0.38470 | 0.35068 | 0.10844 |
| P27 | 0.24425 | 0.49743 | 0.19777 |
| P28 | 0.10801 | 0.64768 | 0.29353 |
| P29 | 0.28746 | 0.44324 | 0.06421 |
| P30 | 0.14862 | 0.59146 | 0.15267 |
| P31 | 0.00814 | 0.40605 | 0.24235 |
| P32 | 0.37524 | 0.55656 | 0.32666 |
| P33 | 0.12079 | 0.44324 | 0.06421 |
| P34 | 0.48195 | 0.59146 | 0.15267 |
| P35 | 0.34358 | 0.40481 | 0.24201 |
| P36 | 0.20563 | 0.55905 | 0.32630 |
| P37 | 0.52354 | 0.53580 | 0.01998 |
| P38 | 0.88470 | 0.35068 | 0.10844 |
| P39 | 0.74425 | 0.49743 | 0.19777 |
| P40 | 0.60801 | 0.64768 | 0.29353 |
| P41 | 0.78746 | 0.44324 | 0.06421 |
| P42 | 0.64862 | 0.59146 | 0.15267 |
| P43 | 0.50814 | 0.40605 | 0.24235 |
| P44 | 0.87524 | 0.55656 | 0.32666 |
| P45 | 0.62079 | 0.44324 | 0.06421 |
| P46 | 0.98195 | 0.59146 | 0.15267 |

---



---

|     |         |         |         |
|-----|---------|---------|---------|
| P47 | 0.84358 | 0.40481 | 0.24201 |
| P48 | 0.70563 | 0.55905 | 0.32630 |
| P49 | 0.02354 | 0.86913 | 0.01998 |
| P50 | 0.38470 | 0.68402 | 0.10844 |
| P51 | 0.24526 | 0.83120 | 0.19785 |
| P52 | 0.10776 | 0.98088 | 0.29352 |
| P53 | 0.28746 | 0.77658 | 0.06421 |
| P54 | 0.14862 | 0.92479 | 0.15267 |
| P55 | 0.00788 | 0.73846 | 0.24232 |
| P56 | 0.37602 | 0.89097 | 0.32659 |
| P57 | 0.12079 | 0.77658 | 0.06421 |
| P58 | 0.48195 | 0.92479 | 0.15267 |
| P59 | 0.34395 | 0.73869 | 0.24199 |
| P60 | 0.20617 | 0.89323 | 0.32663 |
| P61 | 0.52354 | 0.86913 | 0.01998 |
| P62 | 0.88470 | 0.68402 | 0.10844 |
| P63 | 0.74526 | 0.83120 | 0.19785 |
| P64 | 0.60776 | 0.98088 | 0.29352 |
| P65 | 0.78746 | 0.77658 | 0.06421 |
| P66 | 0.64862 | 0.92479 | 0.15267 |
| P67 | 0.50788 | 0.73846 | 0.24232 |
| P68 | 0.87602 | 0.89097 | 0.32659 |
| P69 | 0.62079 | 0.77658 | 0.06421 |
| P70 | 0.98195 | 0.92479 | 0.15267 |
| P71 | 0.84395 | 0.73869 | 0.24199 |

---

|     |         |         |         |
|-----|---------|---------|---------|
| P72 | 0.70617 | 0.89323 | 0.32663 |
|-----|---------|---------|---------|

**Table S4** Unit-cell and position parameters of Mn-5Ni<sub>2</sub>P optimization model.

| <b>Mn-5Ni<sub>2</sub>P</b> |                 |                 |                 |
|----------------------------|-----------------|-----------------|-----------------|
| <i>a</i> (Å)               | 20.56060        |                 |                 |
| <i>b</i> (Å)               | 20.39730        |                 |                 |
| <i>c</i> (Å)               | 25.00000        |                 |                 |
| $\alpha$ (deg)             | 90.00000        |                 |                 |
| $\beta$ (deg)              | 90.00000        |                 |                 |
| $\gamma$ (deg)             | 139.11300       |                 |                 |
| <b>Atom Coordinates</b>    | <b><i>x</i></b> | <b><i>y</i></b> | <b><i>z</i></b> |
| Ni1                        | 0.16448         | 0.26031         | 0.05450         |
| Ni2                        | 0.02565         | 0.07519         | 0.14296         |
| Ni3                        | 0.38429         | 0.22154         | 0.23247         |
| Ni4                        | 0.24536         | 0.02232         | 0.31249         |
| Ni5                        | 0.46936         | 0.26031         | 0.05450         |
| Ni6                        | 0.33052         | 0.07519         | 0.14296         |
| Ni7                        | 0.19101         | 0.22165         | 0.23238         |
| Ni8                        | 0.03143         | 0.02203         | 0.31285         |
| Ni9                        | 0.49101         | 0.07053         | 0.04070         |
| Ni10                       | 0.35217         | 0.21874         | 0.12916         |
| Ni11                       | 0.21140         | 0.03276         | 0.21818         |
| Ni12                       | 0.06719         | 0.17523         | 0.30720         |
| Ni13                       | 0.15203         | 0.04046         | 0.02275         |

---

|      |         |         |         |
|------|---------|---------|---------|
| Ni14 | 0.01319 | 0.18867 | 0.11122 |
| Ni15 | 0.37145 | 0.99954 | 0.19786 |
| Ni16 | 0.22516 | 0.13796 | 0.29363 |
| Ni17 | 0.35816 | 0.07053 | 0.04070 |
| Ni18 | 0.21932 | 0.21874 | 0.12916 |
| Ni19 | 0.08075 | 0.03219 | 0.21840 |
| Ni20 | 0.43932 | 0.17587 | 0.30684 |
| Ni21 | 0.66448 | 0.26031 | 0.05450 |
| Ni22 | 0.52565 | 0.07519 | 0.14296 |
| Ni23 | 0.88429 | 0.22154 | 0.23247 |
| Ni24 | 0.74536 | 0.02232 | 0.31249 |
| Ni25 | 0.96936 | 0.26031 | 0.05450 |
| Ni26 | 0.83052 | 0.07519 | 0.14296 |
| Ni27 | 0.69101 | 0.22165 | 0.23238 |
| Ni28 | 0.53143 | 0.02203 | 0.31285 |
| Ni29 | 0.99101 | 0.07053 | 0.04070 |
| Ni30 | 0.85217 | 0.21874 | 0.12916 |
| Ni31 | 0.71140 | 0.03276 | 0.21818 |
| Ni32 | 0.56719 | 0.17523 | 0.30720 |
| Ni33 | 0.65203 | 0.04046 | 0.02275 |
| Ni34 | 0.51319 | 0.18867 | 0.11122 |
| Ni35 | 0.87145 | 0.99954 | 0.19786 |
| Ni36 | 0.72516 | 0.13796 | 0.29363 |
| Ni37 | 0.85816 | 0.07053 | 0.04070 |
| Ni38 | 0.71932 | 0.21874 | 0.12916 |

---

---

|      |         |         |         |
|------|---------|---------|---------|
| Ni39 | 0.58075 | 0.03219 | 0.21840 |
| Ni40 | 0.93932 | 0.17587 | 0.30684 |
| Ni41 | 0.16448 | 0.59364 | 0.05450 |
| Ni42 | 0.02565 | 0.40852 | 0.14296 |
| Ni43 | 0.38401 | 0.55408 | 0.23230 |
| Ni44 | 0.24549 | 0.35653 | 0.31250 |
| Ni45 | 0.46936 | 0.59364 | 0.05450 |
| Ni46 | 0.33052 | 0.40852 | 0.14296 |
| Ni47 | 0.19056 | 0.55453 | 0.23227 |
| Ni48 | 0.03251 | 0.35660 | 0.31258 |
| Ni49 | 0.49101 | 0.40386 | 0.04070 |
| Ni50 | 0.35217 | 0.55208 | 0.12916 |
| Ni51 | 0.21080 | 0.36577 | 0.21809 |
| Ni52 | 0.06686 | 0.50825 | 0.30691 |
| Ni53 | 0.15203 | 0.37379 | 0.02275 |
| Ni54 | 0.01319 | 0.52200 | 0.11122 |
| Ni55 | 0.37109 | 0.33279 | 0.19773 |
| Ni56 | 0.22478 | 0.47097 | 0.29323 |
| Ni57 | 0.35816 | 0.40386 | 0.04070 |
| Ni58 | 0.21932 | 0.55208 | 0.12916 |
| Ni59 | 0.08039 | 0.36546 | 0.21811 |
| Ni60 | 0.43870 | 0.50864 | 0.30651 |
| Ni61 | 0.66448 | 0.59364 | 0.05450 |
| Ni62 | 0.52565 | 0.40852 | 0.14296 |
| Ni63 | 0.88401 | 0.55408 | 0.23230 |

---

---

|      |         |         |         |
|------|---------|---------|---------|
| Ni64 | 0.74549 | 0.35653 | 0.31250 |
| Ni65 | 0.96936 | 0.59364 | 0.05450 |
| Ni66 | 0.83052 | 0.40852 | 0.14296 |
| Ni67 | 0.69056 | 0.55453 | 0.23227 |
| Ni68 | 0.53251 | 0.35660 | 0.31258 |
| Ni69 | 0.99101 | 0.40386 | 0.04070 |
| Ni70 | 0.85217 | 0.55208 | 0.12916 |
| Ni71 | 0.71080 | 0.36577 | 0.21809 |
| Ni72 | 0.56686 | 0.50825 | 0.30691 |
| Ni73 | 0.65203 | 0.37379 | 0.02275 |
| Ni74 | 0.51319 | 0.52200 | 0.11122 |
| Ni75 | 0.87109 | 0.33279 | 0.19773 |
| Ni76 | 0.72478 | 0.47097 | 0.29323 |
| Ni77 | 0.85816 | 0.40386 | 0.04070 |
| Ni78 | 0.71932 | 0.55208 | 0.12916 |
| Ni79 | 0.58039 | 0.36546 | 0.21811 |
| Ni80 | 0.93870 | 0.50864 | 0.30651 |
| Ni81 | 0.16448 | 0.92698 | 0.05450 |
| Ni82 | 0.02565 | 0.74186 | 0.14296 |
| Ni83 | 0.38415 | 0.88708 | 0.23233 |
| Ni84 | 0.24564 | 0.68934 | 0.31257 |
| Ni85 | 0.46936 | 0.92698 | 0.05450 |
| Ni86 | 0.33052 | 0.74186 | 0.14296 |
| Ni87 | 0.19091 | 0.88785 | 0.23240 |
| Ni88 | 0.03242 | 0.68939 | 0.31281 |

---

---

|       |         |         |         |
|-------|---------|---------|---------|
| Ni89  | 0.49101 | 0.73719 | 0.04070 |
| Ni90  | 0.35217 | 0.88541 | 0.12916 |
| Ni91  | 0.21080 | 0.69893 | 0.21818 |
| Ni92  | 0.06692 | 0.84168 | 0.30716 |
| Ni93  | 0.15203 | 0.70712 | 0.02275 |
| Ni94  | 0.01319 | 0.85534 | 0.11122 |
| Ni95  | 0.37096 | 0.66588 | 0.19808 |
| Ni96  | 0.22489 | 0.80430 | 0.29337 |
| Ni97  | 0.35816 | 0.73719 | 0.04070 |
| Ni98  | 0.21932 | 0.88541 | 0.12916 |
| Ni99  | 0.08079 | 0.69906 | 0.21816 |
| Ni100 | 0.43961 | 0.84210 | 0.30689 |
| Ni101 | 0.66448 | 0.92698 | 0.05450 |
| Ni102 | 0.52565 | 0.74186 | 0.14296 |
| Ni103 | 0.88415 | 0.88708 | 0.23233 |
| Ni104 | 0.74564 | 0.68934 | 0.31257 |
| Ni105 | 0.96936 | 0.92698 | 0.05450 |
| Ni106 | 0.83052 | 0.74186 | 0.14296 |
| Ni107 | 0.69091 | 0.88785 | 0.23240 |
| Ni108 | 0.53242 | 0.68939 | 0.31281 |
| Ni109 | 0.99101 | 0.73719 | 0.04070 |
| Ni110 | 0.85217 | 0.88541 | 0.12916 |
| Ni111 | 0.71080 | 0.69893 | 0.21818 |
| Ni112 | 0.56692 | 0.84168 | 0.30716 |
| Ni113 | 0.65203 | 0.70712 | 0.02275 |

---

---

|       |         |         |         |
|-------|---------|---------|---------|
| Ni114 | 0.51319 | 0.85534 | 0.11122 |
| Ni115 | 0.87096 | 0.66588 | 0.19808 |
| Ni116 | 0.72489 | 0.80430 | 0.29337 |
| Ni117 | 0.85816 | 0.73719 | 0.04070 |
| Ni118 | 0.71932 | 0.88541 | 0.12916 |
| Ni119 | 0.58079 | 0.69906 | 0.21816 |
| Ni120 | 0.93961 | 0.84210 | 0.30689 |
| Mn1   | 0.29794 | 0.23500 | 0.03939 |
| Mn2   | 0.15910 | 0.04988 | 0.12786 |
| Mn3   | 0.01683 | 0.19253 | 0.21611 |
| Mn4   | 0.36927 | 0.99687 | 0.30541 |
| Mn5   | 0.79794 | 0.23500 | 0.03939 |
| Mn6   | 0.65910 | 0.04988 | 0.12786 |
| Mn7   | 0.51683 | 0.19253 | 0.21611 |
| Mn8   | 0.86927 | 0.99687 | 0.30541 |
| Mn9   | 0.29794 | 0.56833 | 0.03939 |
| Mn10  | 0.15910 | 0.38322 | 0.12786 |
| Mn11  | 0.01670 | 0.52606 | 0.21600 |
| Mn12  | 0.37004 | 0.33079 | 0.30528 |
| Mn13  | 0.79794 | 0.56833 | 0.03939 |
| Mn14  | 0.65910 | 0.38322 | 0.12786 |
| Mn15  | 0.51670 | 0.52606 | 0.21600 |
| Mn16  | 0.87004 | 0.33079 | 0.30528 |
| Mn17  | 0.29794 | 0.90167 | 0.03939 |
| Mn18  | 0.15910 | 0.71655 | 0.12786 |

---

---

|      |         |         |         |
|------|---------|---------|---------|
| Mn19 | 0.01697 | 0.85926 | 0.21623 |
| Mn20 | 0.36945 | 0.66341 | 0.30544 |
| Mn21 | 0.79794 | 0.90167 | 0.03939 |
| Mn22 | 0.65910 | 0.71655 | 0.12786 |
| Mn23 | 0.51697 | 0.85926 | 0.21623 |
| Mn24 | 0.86945 | 0.66341 | 0.30544 |
| P1   | 0.02354 | 0.20247 | 0.01998 |
| P2   | 0.38470 | 0.01735 | 0.10844 |
| P3   | 0.24424 | 0.16351 | 0.19893 |
| P4   | 0.09975 | 0.30407 | 0.29195 |
| P5   | 0.28746 | 0.10991 | 0.06421 |
| P6   | 0.14862 | 0.25812 | 0.15267 |
| P7   | 0.00674 | 0.07008 | 0.24172 |
| P8   | 0.36813 | 0.21235 | 0.32922 |
| P9   | 0.12079 | 0.10991 | 0.06421 |
| P10  | 0.48195 | 0.25812 | 0.15267 |
| P11  | 0.34244 | 0.07078 | 0.24152 |
| P12  | 0.19395 | 0.21256 | 0.32869 |
| P13  | 0.52354 | 0.20247 | 0.01998 |
| P14  | 0.88470 | 0.01735 | 0.10844 |
| P15  | 0.74424 | 0.16351 | 0.19893 |
| P16  | 0.59975 | 0.30407 | 0.29195 |
| P17  | 0.78746 | 0.10991 | 0.06421 |
| P18  | 0.64862 | 0.25812 | 0.15267 |
| P19  | 0.50674 | 0.07008 | 0.24172 |

---



---

|     |         |         |         |
|-----|---------|---------|---------|
| P20 | 0.86813 | 0.21235 | 0.32922 |
| P21 | 0.62079 | 0.10991 | 0.06421 |
| P22 | 0.98195 | 0.25812 | 0.15267 |
| P23 | 0.84244 | 0.07078 | 0.24152 |
| P24 | 0.69395 | 0.21256 | 0.32869 |
| P25 | 0.02354 | 0.53580 | 0.01998 |
| P26 | 0.38470 | 0.35068 | 0.10844 |
| P27 | 0.24408 | 0.49697 | 0.19877 |
| P28 | 0.09949 | 0.63705 | 0.29199 |
| P29 | 0.28746 | 0.44324 | 0.06421 |
| P30 | 0.14862 | 0.59146 | 0.15267 |
| P31 | 0.00704 | 0.40407 | 0.24095 |
| P32 | 0.36735 | 0.54512 | 0.32932 |
| P33 | 0.12079 | 0.44324 | 0.06421 |
| P34 | 0.48195 | 0.59146 | 0.15267 |
| P35 | 0.34175 | 0.40337 | 0.24113 |
| P36 | 0.19319 | 0.54500 | 0.32886 |
| P37 | 0.52354 | 0.53580 | 0.01998 |
| P38 | 0.88470 | 0.35068 | 0.10844 |
| P39 | 0.74408 | 0.49697 | 0.19877 |
| P40 | 0.59949 | 0.63705 | 0.29199 |
| P41 | 0.78746 | 0.44324 | 0.06421 |
| P42 | 0.64862 | 0.59146 | 0.15267 |
| P43 | 0.50704 | 0.40407 | 0.24095 |
| P44 | 0.86735 | 0.54512 | 0.32932 |

---

---

|     |         |         |         |
|-----|---------|---------|---------|
| P45 | 0.62079 | 0.44324 | 0.06421 |
| P46 | 0.98195 | 0.59146 | 0.15267 |
| P47 | 0.84175 | 0.40337 | 0.24113 |
| P48 | 0.69319 | 0.54500 | 0.32886 |
| P49 | 0.02354 | 0.86913 | 0.01998 |
| P50 | 0.38470 | 0.68402 | 0.10844 |
| P51 | 0.24467 | 0.83044 | 0.19877 |
| P52 | 0.10038 | 0.97127 | 0.29240 |
| P53 | 0.28746 | 0.77658 | 0.06421 |
| P54 | 0.14862 | 0.92479 | 0.15267 |
| P55 | 0.00686 | 0.73689 | 0.24149 |
| P56 | 0.36720 | 0.87725 | 0.32924 |
| P57 | 0.12079 | 0.77658 | 0.06421 |
| P58 | 0.48195 | 0.92479 | 0.15267 |
| P59 | 0.34226 | 0.73753 | 0.24146 |
| P60 | 0.19268 | 0.87759 | 0.32909 |
| P61 | 0.52354 | 0.86913 | 0.01998 |
| P62 | 0.88470 | 0.68402 | 0.10844 |
| P63 | 0.74467 | 0.83044 | 0.19877 |
| P64 | 0.60038 | 0.97127 | 0.29240 |
| P65 | 0.78746 | 0.77658 | 0.06421 |
| P66 | 0.64862 | 0.92479 | 0.15267 |
| P67 | 0.50686 | 0.73689 | 0.24149 |
| P68 | 0.86720 | 0.87725 | 0.32924 |
| P69 | 0.62079 | 0.77658 | 0.06421 |

---

|     |         |         |         |
|-----|---------|---------|---------|
| P70 | 0.98195 | 0.92479 | 0.15267 |
| P71 | 0.84226 | 0.73753 | 0.24146 |
| P72 | 0.69268 | 0.87759 | 0.32909 |

**Table S5** Unit-cell and position parameters of the optimized model for the adsorption of HMF on Ni<sub>2</sub>P.

| <b>Ni<sub>2</sub>P</b>  |                 |                 |                 |
|-------------------------|-----------------|-----------------|-----------------|
| <i>a</i> (Å)            | 20.56060        |                 |                 |
| <i>b</i> (Å)            | 20.39730        |                 |                 |
| <i>c</i> (Å)            | 25.00000        |                 |                 |
| $\alpha$ (deg)          | 90.00000        |                 |                 |
| $\beta$ (deg)           | 90.00000        |                 |                 |
| $\gamma$ (deg)          | 139.11300       |                 |                 |
| <b>Atom Coordinates</b> | <b><i>x</i></b> | <b><i>y</i></b> | <b><i>z</i></b> |
| Ni1                     | 0.16448         | 0.26031         | 0.05450         |
| Ni2                     | 0.02565         | 0.07519         | 0.14296         |
| Ni3                     | 0.38643         | 0.22283         | 0.22947         |
| Ni4                     | 0.25310         | 0.03377         | 0.31343         |
| Ni5                     | 0.29794         | 0.23500         | 0.03939         |
| Ni6                     | 0.15910         | 0.04988         | 0.12786         |
| Ni7                     | 0.01911         | 0.19545         | 0.21435         |
| Ni8                     | 0.37620         | 0.00248         | 0.30122         |
| Ni9                     | 0.46936         | 0.26031         | 0.05450         |
| Ni10                    | 0.33052         | 0.07519         | 0.14296         |

---

|      |         |         |         |
|------|---------|---------|---------|
| Ni11 | 0.19283 | 0.22365 | 0.22988 |
| Ni12 | 0.04819 | 0.03833 | 0.31375 |
| Ni13 | 0.49101 | 0.07053 | 0.04070 |
| Ni14 | 0.35217 | 0.21874 | 0.12916 |
| Ni15 | 0.21160 | 0.03307 | 0.21763 |
| Ni16 | 0.07517 | 0.18411 | 0.30275 |
| Ni17 | 0.15203 | 0.04046 | 0.02275 |
| Ni18 | 0.01319 | 0.18867 | 0.11122 |
| Ni19 | 0.37377 | 0.00224 | 0.19717 |
| Ni20 | 0.23391 | 0.14774 | 0.29026 |
| Ni21 | 0.35816 | 0.07053 | 0.04070 |
| Ni22 | 0.21932 | 0.21874 | 0.12916 |
| Ni23 | 0.08060 | 0.03177 | 0.21750 |
| Ni24 | 0.44601 | 0.18439 | 0.30250 |
| Ni25 | 0.66448 | 0.26031 | 0.05450 |
| Ni26 | 0.52565 | 0.07519 | 0.14296 |
| Ni27 | 0.88556 | 0.22196 | 0.22955 |
| Ni28 | 0.75192 | 0.03245 | 0.31308 |
| Ni29 | 0.79794 | 0.23500 | 0.03939 |
| Ni30 | 0.65910 | 0.04988 | 0.12786 |
| Ni31 | 0.52064 | 0.19484 | 0.21485 |
| Ni32 | 0.87293 | 0.00469 | 0.30110 |
| Ni33 | 0.96936 | 0.26031 | 0.05450 |
| Ni34 | 0.83052 | 0.07519 | 0.14296 |
| Ni35 | 0.69348 | 0.22406 | 0.23012 |

---

---

|      |         |         |         |
|------|---------|---------|---------|
| Ni36 | 0.53914 | 0.02992 | 0.31324 |
| Ni37 | 0.99101 | 0.07053 | 0.04070 |
| Ni38 | 0.85217 | 0.21874 | 0.12916 |
| Ni39 | 0.71044 | 0.03221 | 0.21775 |
| Ni40 | 0.57605 | 0.18358 | 0.30387 |
| Ni41 | 0.65203 | 0.04046 | 0.02275 |
| Ni42 | 0.51319 | 0.18867 | 0.11122 |
| Ni43 | 0.87338 | 0.00219 | 0.19711 |
| Ni44 | 0.73161 | 0.14606 | 0.29081 |
| Ni45 | 0.85816 | 0.07053 | 0.04070 |
| Ni46 | 0.71932 | 0.21874 | 0.12916 |
| Ni47 | 0.58109 | 0.03249 | 0.21743 |
| Ni48 | 0.94597 | 0.18477 | 0.30242 |
| Ni49 | 0.16448 | 0.59364 | 0.05450 |
| Ni50 | 0.02565 | 0.40852 | 0.14296 |
| Ni51 | 0.38573 | 0.55606 | 0.22920 |
| Ni52 | 0.25207 | 0.36589 | 0.31265 |
| Ni53 | 0.29794 | 0.56833 | 0.03939 |
| Ni54 | 0.15910 | 0.38322 | 0.12786 |
| Ni55 | 0.02003 | 0.52887 | 0.21497 |
| Ni56 | 0.37507 | 0.33698 | 0.30047 |
| Ni57 | 0.46936 | 0.59364 | 0.05450 |
| Ni58 | 0.33052 | 0.40852 | 0.14296 |
| Ni59 | 0.19228 | 0.55668 | 0.23001 |
| Ni60 | 0.04222 | 0.36604 | 0.31363 |

---

---

|      |         |         |         |
|------|---------|---------|---------|
| Ni61 | 0.49101 | 0.40386 | 0.04070 |
| Ni62 | 0.35217 | 0.55208 | 0.12916 |
| Ni63 | 0.21040 | 0.36569 | 0.21745 |
| Ni64 | 0.07537 | 0.51750 | 0.30390 |
| Ni65 | 0.15203 | 0.37379 | 0.02275 |
| Ni66 | 0.01319 | 0.52200 | 0.11122 |
| Ni67 | 0.37338 | 0.33517 | 0.19676 |
| Ni68 | 0.23262 | 0.48066 | 0.29062 |
| Ni69 | 0.35816 | 0.40386 | 0.04070 |
| Ni70 | 0.21932 | 0.55208 | 0.12916 |
| Ni71 | 0.08044 | 0.36525 | 0.21757 |
| Ni72 | 0.44611 | 0.51850 | 0.30136 |
| Ni73 | 0.66448 | 0.59364 | 0.05450 |
| Ni74 | 0.52565 | 0.40852 | 0.14296 |
| Ni75 | 0.88621 | 0.55530 | 0.22944 |
| Ni76 | 0.75191 | 0.36641 | 0.31379 |
| Ni77 | 0.79794 | 0.56833 | 0.03939 |
| Ni78 | 0.65910 | 0.38322 | 0.12786 |
| Ni79 | 0.52014 | 0.52846 | 0.21413 |
| Ni80 | 0.87567 | 0.33611 | 0.30152 |
| Ni81 | 0.96936 | 0.59364 | 0.05450 |
| Ni82 | 0.83052 | 0.40852 | 0.14296 |
| Ni83 | 0.69058 | 0.55399 | 0.22925 |
| Ni84 | 0.54308 | 0.36606 | 0.31330 |
| Ni85 | 0.99101 | 0.40386 | 0.04070 |

---

---

|       |         |         |         |
|-------|---------|---------|---------|
| Ni86  | 0.85217 | 0.55208 | 0.12916 |
| Ni87  | 0.71077 | 0.36516 | 0.21761 |
| Ni88  | 0.57456 | 0.51620 | 0.30220 |
| Ni89  | 0.65203 | 0.37379 | 0.02275 |
| Ni90  | 0.51319 | 0.52200 | 0.11122 |
| Ni91  | 0.87398 | 0.33562 | 0.19729 |
| Ni92  | 0.73213 | 0.47837 | 0.28907 |
| Ni93  | 0.85816 | 0.40386 | 0.04070 |
| Ni94  | 0.71932 | 0.55208 | 0.12916 |
| Ni95  | 0.58046 | 0.36417 | 0.21735 |
| Ni96  | 0.94443 | 0.51616 | 0.30310 |
| Ni97  | 0.16448 | 0.92698 | 0.05450 |
| Ni98  | 0.02565 | 0.74186 | 0.14296 |
| Ni99  | 0.38579 | 0.88846 | 0.22964 |
| Ni100 | 0.25165 | 0.70012 | 0.31355 |
| Ni101 | 0.29794 | 0.90167 | 0.03939 |
| Ni102 | 0.15910 | 0.71655 | 0.12786 |
| Ni103 | 0.02108 | 0.86256 | 0.21495 |
| Ni104 | 0.37473 | 0.67023 | 0.30155 |
| Ni105 | 0.46936 | 0.92698 | 0.05450 |
| Ni106 | 0.33052 | 0.74186 | 0.14296 |
| Ni107 | 0.19247 | 0.89019 | 0.22991 |
| Ni108 | 0.03793 | 0.69630 | 0.31335 |
| Ni109 | 0.49101 | 0.73719 | 0.04070 |
| Ni110 | 0.35217 | 0.88541 | 0.12916 |

---

---

|       |         |         |         |
|-------|---------|---------|---------|
| Ni111 | 0.21023 | 0.69875 | 0.21781 |
| Ni112 | 0.07592 | 0.85106 | 0.30409 |
| Ni113 | 0.15203 | 0.70712 | 0.02275 |
| Ni114 | 0.01319 | 0.85534 | 0.11122 |
| Ni115 | 0.37386 | 0.66959 | 0.19746 |
| Ni116 | 0.23085 | 0.81270 | 0.29087 |
| Ni117 | 0.35816 | 0.73719 | 0.04070 |
| Ni118 | 0.21932 | 0.88541 | 0.12916 |
| Ni119 | 0.08078 | 0.69899 | 0.21760 |
| Ni120 | 0.44492 | 0.84988 | 0.30319 |
| Ni121 | 0.66448 | 0.92698 | 0.05450 |
| Ni122 | 0.52565 | 0.74186 | 0.14296 |
| Ni123 | 0.88624 | 0.88938 | 0.22877 |
| Ni124 | 0.75319 | 0.69903 | 0.31877 |
| Ni125 | 0.79794 | 0.90167 | 0.03939 |
| Ni126 | 0.65910 | 0.71655 | 0.12786 |
| Ni127 | 0.52002 | 0.86273 | 0.21498 |
| Ni128 | 0.87350 | 0.66774 | 0.30118 |
| Ni129 | 0.96936 | 0.92698 | 0.05450 |
| Ni130 | 0.83052 | 0.74186 | 0.14296 |
| Ni131 | 0.69176 | 0.88929 | 0.23001 |
| Ni132 | 0.54380 | 0.70030 | 0.31369 |
| Ni133 | 0.99101 | 0.73719 | 0.04070 |
| Ni134 | 0.85217 | 0.88541 | 0.12916 |
| Ni135 | 0.71083 | 0.69765 | 0.22013 |

---



---

|       |         |         |         |
|-------|---------|---------|---------|
| Ni136 | 0.57532 | 0.85046 | 0.30367 |
| Ni137 | 0.65203 | 0.70712 | 0.02275 |
| Ni138 | 0.51319 | 0.85534 | 0.11122 |
| Ni139 | 0.87325 | 0.66885 | 0.19751 |
| Ni140 | 0.73374 | 0.81472 | 0.29036 |
| Ni141 | 0.85816 | 0.73719 | 0.04070 |
| Ni142 | 0.71932 | 0.88541 | 0.12916 |
| Ni143 | 0.58063 | 0.69838 | 0.21768 |
| Ni144 | 0.94719 | 0.85481 | 0.30193 |
| P1    | 0.02354 | 0.20247 | 0.01998 |
| P2    | 0.38470 | 0.01735 | 0.10844 |
| P3    | 0.24436 | 0.16359 | 0.19738 |
| P4    | 0.10794 | 0.31351 | 0.29349 |
| P5    | 0.28746 | 0.10991 | 0.06421 |
| P6    | 0.14862 | 0.25812 | 0.15267 |
| P7    | 0.00754 | 0.07145 | 0.24187 |
| P8    | 0.37650 | 0.22332 | 0.32617 |
| P9    | 0.12079 | 0.10991 | 0.06421 |
| P10   | 0.48195 | 0.25812 | 0.15267 |
| P11   | 0.34381 | 0.07135 | 0.24194 |
| P12   | 0.20456 | 0.22369 | 0.32590 |
| P13   | 0.52354 | 0.20247 | 0.01998 |
| P14   | 0.88470 | 0.01735 | 0.10844 |
| P15   | 0.74455 | 0.16370 | 0.19745 |
| P16   | 0.60744 | 0.31187 | 0.29320 |

---

---

|     |         |         |         |
|-----|---------|---------|---------|
| P17 | 0.78746 | 0.10991 | 0.06421 |
| P18 | 0.64862 | 0.25812 | 0.15267 |
| P19 | 0.50775 | 0.07131 | 0.24221 |
| P20 | 0.87603 | 0.22313 | 0.32579 |
| P21 | 0.62079 | 0.10991 | 0.06421 |
| P22 | 0.98195 | 0.25812 | 0.15267 |
| P23 | 0.84322 | 0.07152 | 0.24154 |
| P24 | 0.70620 | 0.22544 | 0.32611 |
| P25 | 0.02354 | 0.53580 | 0.01998 |
| P26 | 0.38470 | 0.35068 | 0.10844 |
| P27 | 0.24412 | 0.49719 | 0.19762 |
| P28 | 0.10593 | 0.64576 | 0.29355 |
| P29 | 0.28746 | 0.44324 | 0.06421 |
| P30 | 0.14862 | 0.59146 | 0.15267 |
| P31 | 0.00809 | 0.40530 | 0.24248 |
| P32 | 0.37692 | 0.55796 | 0.32540 |
| P33 | 0.12079 | 0.44324 | 0.06421 |
| P34 | 0.48195 | 0.59146 | 0.15267 |
| P35 | 0.34310 | 0.40415 | 0.24121 |
| P36 | 0.20504 | 0.55809 | 0.32625 |
| P37 | 0.52354 | 0.53580 | 0.01998 |
| P38 | 0.88470 | 0.35068 | 0.10844 |
| P39 | 0.74453 | 0.49647 | 0.19700 |
| P40 | 0.60852 | 0.64671 | 0.29365 |
| P41 | 0.78746 | 0.44324 | 0.06421 |

---

---

|     |         |         |         |
|-----|---------|---------|---------|
| P42 | 0.64862 | 0.59146 | 0.15267 |
| P43 | 0.50681 | 0.40330 | 0.24155 |
| P44 | 0.87363 | 0.55395 | 0.32700 |
| P45 | 0.62079 | 0.44324 | 0.06421 |
| P46 | 0.98195 | 0.59146 | 0.15267 |
| P47 | 0.84305 | 0.40386 | 0.24206 |
| P48 | 0.70138 | 0.55200 | 0.32446 |
| P49 | 0.02354 | 0.86913 | 0.01998 |
| P50 | 0.38470 | 0.68402 | 0.10844 |
| P51 | 0.24482 | 0.83061 | 0.19795 |
| P52 | 0.10917 | 0.98092 | 0.29355 |
| P53 | 0.28746 | 0.77658 | 0.06421 |
| P54 | 0.14862 | 0.92479 | 0.15267 |
| P55 | 0.00722 | 0.73790 | 0.24245 |
| P56 | 0.37363 | 0.88733 | 0.32638 |
| P57 | 0.12079 | 0.77658 | 0.06421 |
| P58 | 0.48195 | 0.92479 | 0.15267 |
| P59 | 0.34297 | 0.73803 | 0.24207 |
| P60 | 0.20601 | 0.89226 | 0.32603 |
| P61 | 0.52354 | 0.86913 | 0.01998 |
| P62 | 0.88470 | 0.68402 | 0.10844 |
| P63 | 0.74426 | 0.82957 | 0.19761 |
| P64 | 0.60654 | 0.97906 | 0.29364 |
| P65 | 0.78746 | 0.77658 | 0.06421 |
| P66 | 0.64862 | 0.92479 | 0.15267 |

---

---

|     |         |         |         |
|-----|---------|---------|---------|
| P67 | 0.50733 | 0.73782 | 0.24246 |
| P68 | 0.88141 | 0.89848 | 0.32362 |
| P69 | 0.62079 | 0.77658 | 0.06421 |
| P70 | 0.98195 | 0.92479 | 0.15267 |
| P71 | 0.84198 | 0.73568 | 0.24439 |
| P72 | 0.70459 | 0.89060 | 0.32678 |
| C1  | 0.46086 | 0.54238 | 0.46136 |
| C2  | 0.62288 | 0.67618 | 0.45221 |
| C3  | 0.58830 | 0.70793 | 0.47424 |
| C4  | 0.48431 | 0.62223 | 0.47978 |
| C5  | 0.36487 | 0.43357 | 0.45479 |
| C6  | 0.71813 | 0.73163 | 0.43161 |
| O1  | 0.54379 | 0.57361 | 0.44470 |
| O2  | 0.28187 | 0.40866 | 0.47072 |
| O3  | 0.73620 | 0.69445 | 0.40564 |
| H1  | 0.63367 | 0.78502 | 0.48368 |
| H2  | 0.43169 | 0.61853 | 0.49379 |
| H3  | 0.36821 | 0.38825 | 0.47556 |
| H4  | 0.35455 | 0.41457 | 0.41183 |
| H5  | 0.77690 | 0.81380 | 0.43870 |
| H6  | 0.27777 | 0.40563 | 0.50959 |

---

**Table S6** Unit-cell and position parameters of the optimized model for the adsorption of HMF on Mn-5Ni<sub>2</sub>P (Ni site).

| <b>Mn-5Ni<sub>2</sub>P</b> |                 |                 |                 |
|----------------------------|-----------------|-----------------|-----------------|
| <i>a</i> (Å)               | 20.56060        |                 |                 |
| <i>b</i> (Å)               | 20.39730        |                 |                 |
| <i>c</i> (Å)               | 25.00000        |                 |                 |
| $\alpha$ (deg)             | 90.00000        |                 |                 |
| $\beta$ (deg)              | 90.00000        |                 |                 |
| $\gamma$ (deg)             | 139.11300       |                 |                 |
| <b>Atom Coordinates</b>    | <b><i>x</i></b> | <b><i>y</i></b> | <b><i>z</i></b> |
| Ni1                        | 0.16448         | 0.26031         | 0.05450         |
| Ni2                        | 0.02565         | 0.07519         | 0.14296         |
| Ni3                        | 0.38344         | 0.21938         | 0.23253         |
| Ni4                        | 0.24426         | 0.02024         | 0.31278         |
| Ni5                        | 0.46936         | 0.26031         | 0.05450         |
| Ni6                        | 0.33052         | 0.07519         | 0.14296         |
| Ni7                        | 0.18942         | 0.21960         | 0.23240         |
| Ni8                        | 0.03498         | 0.02437         | 0.31302         |
| Ni9                        | 0.49101         | 0.07053         | 0.04070         |
| Ni10                       | 0.35217         | 0.21874         | 0.12916         |
| Ni11                       | 0.21060         | 0.03151         | 0.21837         |
| Ni12                       | 0.06574         | 0.17358         | 0.30748         |
| Ni13                       | 0.15203         | 0.04046         | 0.02275         |
| Ni14                       | 0.01319         | 0.18867         | 0.11122         |

---

|      |         |         |         |
|------|---------|---------|---------|
| Ni15 | 0.37057 | 0.99806 | 0.19789 |
| Ni16 | 0.22463 | 0.13604 | 0.29366 |
| Ni17 | 0.35816 | 0.07053 | 0.04070 |
| Ni18 | 0.21932 | 0.21874 | 0.12916 |
| Ni19 | 0.08046 | 0.03133 | 0.21832 |
| Ni20 | 0.43825 | 0.17364 | 0.30713 |
| Ni21 | 0.66448 | 0.26031 | 0.05450 |
| Ni22 | 0.52565 | 0.07519 | 0.14296 |
| Ni23 | 0.88331 | 0.21981 | 0.23267 |
| Ni24 | 0.74481 | 0.02122 | 0.31257 |
| Ni25 | 0.96936 | 0.26031 | 0.05450 |
| Ni26 | 0.83052 | 0.07519 | 0.14296 |
| Ni27 | 0.69067 | 0.22047 | 0.23276 |
| Ni28 | 0.53005 | 0.01977 | 0.31300 |
| Ni29 | 0.99101 | 0.07053 | 0.04070 |
| Ni30 | 0.85217 | 0.21874 | 0.12916 |
| Ni31 | 0.71051 | 0.03175 | 0.21834 |
| Ni32 | 0.56665 | 0.17323 | 0.30766 |
| Ni33 | 0.65203 | 0.04046 | 0.02275 |
| Ni34 | 0.51319 | 0.18867 | 0.11122 |
| Ni35 | 0.87079 | 0.99864 | 0.19777 |
| Ni36 | 0.72392 | 0.13567 | 0.29417 |
| Ni37 | 0.85816 | 0.07053 | 0.04070 |
| Ni38 | 0.71932 | 0.21874 | 0.12916 |
| Ni39 | 0.58050 | 0.03136 | 0.21846 |

---

---

|      |         |         |         |
|------|---------|---------|---------|
| Ni40 | 0.93865 | 0.17451 | 0.30673 |
| Ni41 | 0.16448 | 0.59364 | 0.05450 |
| Ni42 | 0.02565 | 0.40852 | 0.14296 |
| Ni43 | 0.38356 | 0.55362 | 0.23198 |
| Ni44 | 0.24431 | 0.35347 | 0.31182 |
| Ni45 | 0.46936 | 0.59364 | 0.05450 |
| Ni46 | 0.33052 | 0.40852 | 0.14296 |
| Ni47 | 0.18978 | 0.55345 | 0.23243 |
| Ni48 | 0.03210 | 0.35511 | 0.31288 |
| Ni49 | 0.49101 | 0.40386 | 0.04070 |
| Ni50 | 0.35217 | 0.55208 | 0.12916 |
| Ni51 | 0.21021 | 0.36510 | 0.21808 |
| Ni52 | 0.06575 | 0.50648 | 0.30727 |
| Ni53 | 0.15203 | 0.37379 | 0.02275 |
| Ni54 | 0.01319 | 0.52200 | 0.11122 |
| Ni55 | 0.37015 | 0.33150 | 0.19756 |
| Ni56 | 0.22405 | 0.46942 | 0.29319 |
| Ni57 | 0.35816 | 0.40386 | 0.04070 |
| Ni58 | 0.21932 | 0.55208 | 0.12916 |
| Ni59 | 0.07981 | 0.36424 | 0.21840 |
| Ni60 | 0.43806 | 0.50748 | 0.30595 |
| Ni61 | 0.66448 | 0.59364 | 0.05450 |
| Ni62 | 0.52565 | 0.40852 | 0.14296 |
| Ni63 | 0.88364 | 0.55301 | 0.23222 |
| Ni64 | 0.74501 | 0.35433 | 0.31224 |

---

---

|      |         |         |         |
|------|---------|---------|---------|
| Ni65 | 0.96936 | 0.59364 | 0.05450 |
| Ni66 | 0.83052 | 0.40852 | 0.14296 |
| Ni67 | 0.68873 | 0.55207 | 0.23187 |
| Ni68 | 0.53282 | 0.35520 | 0.31250 |
| Ni69 | 0.99101 | 0.40386 | 0.04070 |
| Ni70 | 0.85217 | 0.55208 | 0.12916 |
| Ni71 | 0.71017 | 0.36477 | 0.21820 |
| Ni72 | 0.56495 | 0.50577 | 0.30568 |
| Ni73 | 0.65203 | 0.37379 | 0.02275 |
| Ni74 | 0.51319 | 0.52200 | 0.11122 |
| Ni75 | 0.87100 | 0.33218 | 0.19774 |
| Ni76 | 0.72429 | 0.46839 | 0.29273 |
| Ni77 | 0.85816 | 0.40386 | 0.04070 |
| Ni78 | 0.71932 | 0.55208 | 0.12916 |
| Ni79 | 0.57994 | 0.36385 | 0.21824 |
| Ni80 | 0.93804 | 0.50640 | 0.30689 |
| Ni81 | 0.16448 | 0.92698 | 0.05450 |
| Ni82 | 0.02565 | 0.74186 | 0.14296 |
| Ni83 | 0.38339 | 0.88581 | 0.23248 |
| Ni84 | 0.24443 | 0.68751 | 0.31270 |
| Ni85 | 0.46936 | 0.92698 | 0.05450 |
| Ni86 | 0.33052 | 0.74186 | 0.14296 |
| Ni87 | 0.18957 | 0.88627 | 0.23251 |
| Ni88 | 0.03091 | 0.68721 | 0.31284 |
| Ni89 | 0.49101 | 0.73719 | 0.04070 |

---



---

|       |         |         |         |
|-------|---------|---------|---------|
| Ni90  | 0.35217 | 0.88541 | 0.12916 |
| Ni91  | 0.21046 | 0.69845 | 0.21832 |
| Ni92  | 0.06529 | 0.83942 | 0.30765 |
| Ni93  | 0.15203 | 0.70712 | 0.02275 |
| Ni94  | 0.01319 | 0.85534 | 0.11122 |
| Ni95  | 0.37041 | 0.66527 | 0.19802 |
| Ni96  | 0.22381 | 0.80240 | 0.29404 |
| Ni97  | 0.35816 | 0.73719 | 0.04070 |
| Ni98  | 0.21932 | 0.88541 | 0.12916 |
| Ni99  | 0.08037 | 0.69817 | 0.21835 |
| Ni100 | 0.43823 | 0.83999 | 0.30717 |
| Ni101 | 0.66448 | 0.92698 | 0.05450 |
| Ni102 | 0.52565 | 0.74186 | 0.14296 |
| Ni103 | 0.88456 | 0.88692 | 0.23169 |
| Ni104 | 0.74437 | 0.68698 | 0.31596 |
| Ni105 | 0.96936 | 0.92698 | 0.05450 |
| Ni106 | 0.83052 | 0.74186 | 0.14296 |
| Ni107 | 0.69004 | 0.88680 | 0.23243 |
| Ni108 | 0.53252 | 0.68854 | 0.31270 |
| Ni109 | 0.99101 | 0.73719 | 0.04070 |
| Ni110 | 0.85217 | 0.88541 | 0.12916 |
| Ni111 | 0.71074 | 0.69774 | 0.21947 |
| Ni112 | 0.56617 | 0.84014 | 0.30736 |
| Ni113 | 0.65203 | 0.70712 | 0.02275 |
| Ni114 | 0.51319 | 0.85534 | 0.11122 |

---

---

|       |         |         |         |
|-------|---------|---------|---------|
| Ni115 | 0.87021 | 0.66523 | 0.19819 |
| Ni116 | 0.72504 | 0.80365 | 0.29281 |
| Ni117 | 0.85816 | 0.73719 | 0.04070 |
| Ni118 | 0.71932 | 0.88541 | 0.12916 |
| Ni119 | 0.58082 | 0.69854 | 0.21819 |
| Ni120 | 0.93920 | 0.84255 | 0.30711 |
| Mn1   | 0.29794 | 0.23500 | 0.03939 |
| Mn2   | 0.15910 | 0.04988 | 0.12786 |
| Mn3   | 0.01644 | 0.19169 | 0.21607 |
| Mn4   | 0.36815 | 0.99510 | 0.30560 |
| Mn5   | 0.79794 | 0.23500 | 0.03939 |
| Mn6   | 0.65910 | 0.04988 | 0.12786 |
| Mn7   | 0.51624 | 0.19103 | 0.21633 |
| Mn8   | 0.86866 | 0.99688 | 0.30492 |
| Mn9   | 0.29794 | 0.56833 | 0.03939 |
| Mn10  | 0.15910 | 0.38322 | 0.12786 |
| Mn11  | 0.01644 | 0.52515 | 0.21610 |
| Mn12  | 0.36857 | 0.32851 | 0.30468 |
| Mn13  | 0.79794 | 0.56833 | 0.03939 |
| Mn14  | 0.65910 | 0.38322 | 0.12786 |
| Mn15  | 0.51617 | 0.52516 | 0.21545 |
| Mn16  | 0.86895 | 0.32879 | 0.30527 |
| Mn17  | 0.29794 | 0.90167 | 0.03939 |
| Mn18  | 0.15910 | 0.71655 | 0.12786 |
| Mn19  | 0.01638 | 0.85821 | 0.21641 |

---

---

|      |         |         |         |
|------|---------|---------|---------|
| Mn20 | 0.36843 | 0.66228 | 0.30549 |
| Mn21 | 0.79794 | 0.90167 | 0.03939 |
| Mn22 | 0.65910 | 0.71655 | 0.12786 |
| Mn23 | 0.51646 | 0.85825 | 0.21629 |
| Mn24 | 0.86787 | 0.66087 | 0.30578 |
| P1   | 0.02354 | 0.20247 | 0.01998 |
| P2   | 0.38470 | 0.01735 | 0.10844 |
| P3   | 0.24397 | 0.16284 | 0.19900 |
| P4   | 0.09941 | 0.30285 | 0.29244 |
| P5   | 0.28746 | 0.10991 | 0.06421 |
| P6   | 0.14862 | 0.25812 | 0.15267 |
| P7   | 0.00668 | 0.06968 | 0.24145 |
| P8   | 0.36803 | 0.21135 | 0.32934 |
| P9   | 0.12079 | 0.10991 | 0.06421 |
| P10  | 0.48195 | 0.25812 | 0.15267 |
| P11  | 0.34098 | 0.06825 | 0.24174 |
| P12  | 0.19185 | 0.20918 | 0.32896 |
| P13  | 0.52354 | 0.20247 | 0.01998 |
| P14  | 0.88470 | 0.01735 | 0.10844 |
| P15  | 0.74414 | 0.16315 | 0.19916 |
| P16  | 0.59894 | 0.30162 | 0.29230 |
| P17  | 0.78746 | 0.10991 | 0.06421 |
| P18  | 0.64862 | 0.25812 | 0.15267 |
| P19  | 0.50592 | 0.06837 | 0.24183 |
| P20  | 0.86761 | 0.21106 | 0.32946 |

---

---

|     |         |         |         |
|-----|---------|---------|---------|
| P21 | 0.62079 | 0.10991 | 0.06421 |
| P22 | 0.98195 | 0.25812 | 0.15267 |
| P23 | 0.84174 | 0.06995 | 0.24116 |
| P24 | 0.69391 | 0.21115 | 0.32934 |
| P25 | 0.02354 | 0.53580 | 0.01998 |
| P26 | 0.38470 | 0.35068 | 0.10844 |
| P27 | 0.24360 | 0.49633 | 0.19866 |
| P28 | 0.09871 | 0.63555 | 0.29217 |
| P29 | 0.28746 | 0.44324 | 0.06421 |
| P30 | 0.14862 | 0.59146 | 0.15267 |
| P31 | 0.00621 | 0.40246 | 0.24147 |
| P32 | 0.36729 | 0.54489 | 0.32807 |
| P33 | 0.12079 | 0.44324 | 0.06421 |
| P34 | 0.48195 | 0.59146 | 0.15267 |
| P35 | 0.34134 | 0.40278 | 0.24072 |
| P36 | 0.19229 | 0.54312 | 0.32889 |
| P37 | 0.52354 | 0.53580 | 0.01998 |
| P38 | 0.88470 | 0.35068 | 0.10844 |
| P39 | 0.74407 | 0.49652 | 0.19865 |
| P40 | 0.59920 | 0.63593 | 0.29182 |
| P41 | 0.78746 | 0.44324 | 0.06421 |
| P42 | 0.64862 | 0.59146 | 0.15267 |
| P43 | 0.50533 | 0.40118 | 0.24037 |
| P44 | 0.86696 | 0.54293 | 0.32939 |
| P45 | 0.62079 | 0.44324 | 0.06421 |

---

---

|     |         |         |         |
|-----|---------|---------|---------|
| P46 | 0.98195 | 0.59146 | 0.15267 |
| P47 | 0.84162 | 0.40297 | 0.24085 |
| P48 | 0.68899 | 0.53867 | 0.32729 |
| P49 | 0.02354 | 0.86913 | 0.01998 |
| P50 | 0.38470 | 0.68402 | 0.10844 |
| P51 | 0.24395 | 0.82951 | 0.19902 |
| P52 | 0.10009 | 0.96953 | 0.29253 |
| P53 | 0.28746 | 0.77658 | 0.06421 |
| P54 | 0.14862 | 0.92479 | 0.15267 |
| P55 | 0.00566 | 0.73537 | 0.24150 |
| P56 | 0.36580 | 0.87517 | 0.32944 |
| P57 | 0.12079 | 0.77658 | 0.06421 |
| P58 | 0.48195 | 0.92479 | 0.15267 |
| P59 | 0.34140 | 0.73628 | 0.24151 |
| P60 | 0.19130 | 0.87564 | 0.32913 |
| P61 | 0.52354 | 0.86913 | 0.01998 |
| P62 | 0.88470 | 0.68402 | 0.10844 |
| P63 | 0.74450 | 0.82967 | 0.19878 |
| P64 | 0.59911 | 0.96918 | 0.29255 |
| P65 | 0.78746 | 0.77658 | 0.06421 |
| P66 | 0.64862 | 0.92479 | 0.15267 |
| P67 | 0.50581 | 0.73548 | 0.24147 |
| P68 | 0.87021 | 0.88240 | 0.32721 |
| P69 | 0.62079 | 0.77658 | 0.06421 |
| P70 | 0.98195 | 0.92479 | 0.15267 |

---

---

|     |         |         |         |
|-----|---------|---------|---------|
| P71 | 0.84078 | 0.73497 | 0.24344 |
| P72 | 0.69255 | 0.87682 | 0.32890 |
| C1  | 0.45898 | 0.53961 | 0.45988 |
| C2  | 0.62150 | 0.67087 | 0.45187 |
| C3  | 0.58863 | 0.70502 | 0.47246 |
| C4  | 0.48421 | 0.62082 | 0.47740 |
| C5  | 0.36189 | 0.43128 | 0.45339 |
| C6  | 0.71756 | 0.72368 | 0.43427 |
| O1  | 0.54112 | 0.56844 | 0.44442 |
| O2  | 0.28017 | 0.40829 | 0.46954 |
| O3  | 0.73590 | 0.68499 | 0.41107 |
| H1  | 0.63555 | 0.78265 | 0.48163 |
| H2  | 0.43269 | 0.61911 | 0.49063 |
| H3  | 0.36386 | 0.38469 | 0.47380 |
| H4  | 0.35066 | 0.41231 | 0.41030 |
| H5  | 0.77722 | 0.80603 | 0.44144 |
| H6  | 0.27889 | 0.40941 | 0.50842 |

---

**Table S7** Unit-cell and position parameters of the optimized model for the adsorption of HMF on Mn-5Ni<sub>2</sub>P (Mn site).

| <b>Mn-5Ni<sub>2</sub>P</b> |           |         |         |
|----------------------------|-----------|---------|---------|
| $a$ (Å)                    | 20.56060  |         |         |
| $b$ (Å)                    | 20.39730  |         |         |
| $c$ (Å)                    | 25.00000  |         |         |
| $\alpha$ (deg)             | 90.00000  |         |         |
| $\beta$ (deg)              | 90.00000  |         |         |
| $\gamma$ (deg)             | 139.11300 |         |         |
| <b>Atom Coordinates</b>    | $x$       | $y$     | $z$     |
| Ni1                        | 0.16448   | 0.26031 | 0.05450 |
| Ni2                        | 0.02565   | 0.07519 | 0.14296 |
| Ni3                        | 0.38208   | 0.21756 | 0.23238 |
| Ni4                        | 0.24327   | 0.02000 | 0.31292 |
| Ni5                        | 0.46936   | 0.26031 | 0.05450 |
| Ni6                        | 0.33052   | 0.07519 | 0.14296 |
| Ni7                        | 0.18770   | 0.21792 | 0.23234 |
| Ni8                        | 0.02963   | 0.01932 | 0.31308 |
| Ni9                        | 0.49101   | 0.07053 | 0.04070 |
| Ni10                       | 0.35217   | 0.21874 | 0.12916 |
| Ni11                       | 0.20988   | 0.03075 | 0.21840 |
| Ni12                       | 0.06504   | 0.17254 | 0.30797 |
| Ni13                       | 0.15203   | 0.04046 | 0.02275 |
| Ni14                       | 0.01319   | 0.18867 | 0.11122 |

---

|      |         |         |         |
|------|---------|---------|---------|
| Ni15 | 0.37012 | 0.99757 | 0.19797 |
| Ni16 | 0.22204 | 0.13375 | 0.29367 |
| Ni17 | 0.35816 | 0.07053 | 0.04070 |
| Ni18 | 0.21932 | 0.21874 | 0.12916 |
| Ni19 | 0.07944 | 0.03004 | 0.21851 |
| Ni20 | 0.43769 | 0.17248 | 0.30733 |
| Ni21 | 0.66448 | 0.26031 | 0.05450 |
| Ni22 | 0.52565 | 0.07519 | 0.14296 |
| Ni23 | 0.88262 | 0.21779 | 0.23230 |
| Ni24 | 0.74352 | 0.02038 | 0.31297 |
| Ni25 | 0.96936 | 0.26031 | 0.05450 |
| Ni26 | 0.83052 | 0.07519 | 0.14296 |
| Ni27 | 0.69071 | 0.22043 | 0.23277 |
| Ni28 | 0.52990 | 0.01966 | 0.31301 |
| Ni29 | 0.99101 | 0.07053 | 0.04070 |
| Ni30 | 0.85217 | 0.21874 | 0.12916 |
| Ni31 | 0.71013 | 0.03100 | 0.21842 |
| Ni32 | 0.56642 | 0.17324 | 0.30760 |
| Ni33 | 0.65203 | 0.04046 | 0.02275 |
| Ni34 | 0.51319 | 0.18867 | 0.11122 |
| Ni35 | 0.87068 | 0.99815 | 0.19790 |
| Ni36 | 0.72295 | 0.13489 | 0.29368 |
| Ni37 | 0.85816 | 0.07053 | 0.04070 |
| Ni38 | 0.71932 | 0.21874 | 0.12916 |
| Ni39 | 0.58040 | 0.03126 | 0.21843 |

---



---

|      |         |         |         |
|------|---------|---------|---------|
| Ni40 | 0.93723 | 0.17245 | 0.30768 |
| Ni41 | 0.16448 | 0.59364 | 0.05450 |
| Ni42 | 0.02565 | 0.40852 | 0.14296 |
| Ni43 | 0.38279 | 0.55229 | 0.23236 |
| Ni44 | 0.24386 | 0.35291 | 0.31216 |
| Ni45 | 0.46936 | 0.59364 | 0.05450 |
| Ni46 | 0.33052 | 0.40852 | 0.14296 |
| Ni47 | 0.19038 | 0.55356 | 0.23252 |
| Ni48 | 0.02936 | 0.35236 | 0.31274 |
| Ni49 | 0.49101 | 0.40386 | 0.04070 |
| Ni50 | 0.35217 | 0.55208 | 0.12916 |
| Ni51 | 0.20929 | 0.36424 | 0.21841 |
| Ni52 | 0.06641 | 0.50611 | 0.30750 |
| Ni53 | 0.15203 | 0.37379 | 0.02275 |
| Ni54 | 0.01319 | 0.52200 | 0.11122 |
| Ni55 | 0.36863 | 0.33003 | 0.19754 |
| Ni56 | 0.22359 | 0.46828 | 0.29371 |
| Ni57 | 0.35816 | 0.40386 | 0.04070 |
| Ni58 | 0.21932 | 0.55208 | 0.12916 |
| Ni59 | 0.07967 | 0.36409 | 0.21853 |
| Ni60 | 0.43703 | 0.50582 | 0.30656 |
| Ni61 | 0.66448 | 0.59364 | 0.05450 |
| Ni62 | 0.52565 | 0.40852 | 0.14296 |
| Ni63 | 0.88365 | 0.55179 | 0.23165 |
| Ni64 | 0.74491 | 0.35486 | 0.31241 |

---

---

|      |         |         |         |
|------|---------|---------|---------|
| Ni65 | 0.96936 | 0.59364 | 0.05450 |
| Ni66 | 0.83052 | 0.40852 | 0.14296 |
| Ni67 | 0.68606 | 0.55099 | 0.23010 |
| Ni68 | 0.52983 | 0.35243 | 0.31213 |
| Ni69 | 0.99101 | 0.40386 | 0.04070 |
| Ni70 | 0.85217 | 0.55208 | 0.12916 |
| Ni71 | 0.70967 | 0.36415 | 0.21833 |
| Ni72 | 0.56171 | 0.50311 | 0.30546 |
| Ni73 | 0.65203 | 0.37379 | 0.02275 |
| Ni74 | 0.51319 | 0.52200 | 0.11122 |
| Ni75 | 0.87087 | 0.33164 | 0.19777 |
| Ni76 | 0.72481 | 0.47011 | 0.29157 |
| Ni77 | 0.85816 | 0.40386 | 0.04070 |
| Ni78 | 0.71932 | 0.55208 | 0.12916 |
| Ni79 | 0.57953 | 0.36340 | 0.21825 |
| Ni80 | 0.93890 | 0.50561 | 0.30662 |
| Ni81 | 0.16448 | 0.92698 | 0.05450 |
| Ni82 | 0.02565 | 0.74186 | 0.14296 |
| Ni83 | 0.38332 | 0.88566 | 0.23238 |
| Ni84 | 0.24505 | 0.68736 | 0.31238 |
| Ni85 | 0.46936 | 0.92698 | 0.05450 |
| Ni86 | 0.33052 | 0.74186 | 0.14296 |
| Ni87 | 0.18882 | 0.88574 | 0.23251 |
| Ni88 | 0.02969 | 0.68568 | 0.31213 |
| Ni89 | 0.49101 | 0.73719 | 0.04070 |

---

---

|       |         |         |         |
|-------|---------|---------|---------|
| Ni90  | 0.35217 | 0.88541 | 0.12916 |
| Ni91  | 0.21052 | 0.69832 | 0.21832 |
| Ni92  | 0.06446 | 0.83811 | 0.30786 |
| Ni93  | 0.15203 | 0.70712 | 0.02275 |
| Ni94  | 0.01319 | 0.85534 | 0.11122 |
| Ni95  | 0.37055 | 0.66479 | 0.19790 |
| Ni96  | 0.22372 | 0.80218 | 0.29373 |
| Ni97  | 0.35816 | 0.73719 | 0.04070 |
| Ni98  | 0.21932 | 0.88541 | 0.12916 |
| Ni99  | 0.08048 | 0.69814 | 0.21831 |
| Ni100 | 0.43770 | 0.83930 | 0.30702 |
| Ni101 | 0.66448 | 0.92698 | 0.05450 |
| Ni102 | 0.52565 | 0.74186 | 0.14296 |
| Ni103 | 0.88301 | 0.88530 | 0.23225 |
| Ni104 | 0.74149 | 0.68371 | 0.31041 |
| Ni105 | 0.96936 | 0.92698 | 0.05450 |
| Ni106 | 0.83052 | 0.74186 | 0.14296 |
| Ni107 | 0.69027 | 0.88668 | 0.23283 |
| Ni108 | 0.53024 | 0.68667 | 0.31268 |
| Ni109 | 0.99101 | 0.73719 | 0.04070 |
| Ni110 | 0.85217 | 0.88541 | 0.12916 |
| Ni111 | 0.70929 | 0.69827 | 0.21782 |
| Ni112 | 0.56551 | 0.83957 | 0.30723 |
| Ni113 | 0.65203 | 0.70712 | 0.02275 |
| Ni114 | 0.51319 | 0.85534 | 0.11122 |

---

---

|       |         |         |         |
|-------|---------|---------|---------|
| Ni115 | 0.86952 | 0.66412 | 0.19918 |
| Ni116 | 0.72333 | 0.80183 | 0.29386 |
| Ni117 | 0.85816 | 0.73719 | 0.04070 |
| Ni118 | 0.71932 | 0.88541 | 0.12916 |
| Ni119 | 0.58007 | 0.69822 | 0.21822 |
| Ni120 | 0.93595 | 0.83792 | 0.30663 |
| Mn1   | 0.29794 | 0.23500 | 0.03939 |
| Mn2   | 0.15910 | 0.04988 | 0.12786 |
| Mn3   | 0.01557 | 0.19095 | 0.21657 |
| Mn4   | 0.36803 | 0.99475 | 0.30578 |
| Mn5   | 0.79794 | 0.23500 | 0.03939 |
| Mn6   | 0.65910 | 0.04988 | 0.12786 |
| Mn7   | 0.51579 | 0.19067 | 0.21630 |
| Mn8   | 0.86753 | 0.99446 | 0.30569 |
| Mn9   | 0.29794 | 0.56833 | 0.03939 |
| Mn10  | 0.15910 | 0.38322 | 0.12786 |
| Mn11  | 0.01697 | 0.52476 | 0.21601 |
| Mn12  | 0.36627 | 0.32622 | 0.30466 |
| Mn13  | 0.79794 | 0.56833 | 0.03939 |
| Mn14  | 0.65910 | 0.38322 | 0.12786 |
| Mn15  | 0.51454 | 0.52394 | 0.21533 |
| Mn16  | 0.86826 | 0.32778 | 0.30548 |
| Mn17  | 0.29794 | 0.90167 | 0.03939 |
| Mn18  | 0.15910 | 0.71655 | 0.12786 |
| Mn19  | 0.01515 | 0.85658 | 0.21637 |

---

---

|      |         |         |         |
|------|---------|---------|---------|
| Mn20 | 0.36875 | 0.66141 | 0.30538 |
| Mn21 | 0.79794 | 0.90167 | 0.03939 |
| Mn22 | 0.65910 | 0.71655 | 0.12786 |
| Mn23 | 0.51614 | 0.85802 | 0.21617 |
| Mn24 | 0.86974 | 0.66235 | 0.32691 |
| P1   | 0.02354 | 0.20247 | 0.01998 |
| P2   | 0.38470 | 0.01735 | 0.10844 |
| P3   | 0.24299 | 0.16187 | 0.19903 |
| P4   | 0.09824 | 0.30175 | 0.29299 |
| P5   | 0.28746 | 0.10991 | 0.06421 |
| P6   | 0.14862 | 0.25812 | 0.15267 |
| P7   | 0.00594 | 0.06841 | 0.24187 |
| P8   | 0.36415 | 0.20681 | 0.32910 |
| P9   | 0.12079 | 0.10991 | 0.06421 |
| P10  | 0.48195 | 0.25812 | 0.15267 |
| P11  | 0.34059 | 0.06779 | 0.24168 |
| P12  | 0.19101 | 0.20824 | 0.32889 |
| P13  | 0.52354 | 0.20247 | 0.01998 |
| P14  | 0.88470 | 0.01735 | 0.10844 |
| P15  | 0.74388 | 0.16275 | 0.19902 |
| P16  | 0.59866 | 0.30179 | 0.29237 |
| P17  | 0.78746 | 0.10991 | 0.06421 |
| P18  | 0.64862 | 0.25812 | 0.15267 |
| P19  | 0.50581 | 0.06830 | 0.24175 |
| P20  | 0.86454 | 0.20763 | 0.32942 |

---

---

|     |         |         |         |
|-----|---------|---------|---------|
| P21 | 0.62079 | 0.10991 | 0.06421 |
| P22 | 0.98195 | 0.25812 | 0.15267 |
| P23 | 0.84048 | 0.06780 | 0.24186 |
| P24 | 0.69308 | 0.21044 | 0.32927 |
| P25 | 0.02354 | 0.53580 | 0.01998 |
| P26 | 0.38470 | 0.35068 | 0.10844 |
| P27 | 0.24357 | 0.49605 | 0.19868 |
| P28 | 0.09942 | 0.63530 | 0.29210 |
| P29 | 0.28746 | 0.44324 | 0.06421 |
| P30 | 0.14862 | 0.59146 | 0.15267 |
| P31 | 0.00568 | 0.40176 | 0.24166 |
| P32 | 0.36642 | 0.54257 | 0.32946 |
| P33 | 0.12079 | 0.44324 | 0.06421 |
| P34 | 0.48195 | 0.59146 | 0.15267 |
| P35 | 0.34077 | 0.40228 | 0.24078 |
| P36 | 0.19291 | 0.54313 | 0.32879 |
| P37 | 0.52354 | 0.53580 | 0.01998 |
| P38 | 0.88470 | 0.35068 | 0.10844 |
| P39 | 0.74364 | 0.49623 | 0.19847 |
| P40 | 0.59771 | 0.63478 | 0.29130 |
| P41 | 0.78746 | 0.44324 | 0.06421 |
| P42 | 0.64862 | 0.59146 | 0.15267 |
| P43 | 0.50306 | 0.39896 | 0.24011 |
| P44 | 0.86496 | 0.53895 | 0.32768 |
| P45 | 0.62079 | 0.44324 | 0.06421 |

---

---

|     |         |         |         |
|-----|---------|---------|---------|
| P46 | 0.98195 | 0.59146 | 0.15267 |
| P47 | 0.84133 | 0.40239 | 0.24074 |
| P48 | 0.68766 | 0.53841 | 0.32488 |
| P49 | 0.02354 | 0.86913 | 0.01998 |
| P50 | 0.38470 | 0.68402 | 0.10844 |
| P51 | 0.24381 | 0.82924 | 0.19896 |
| P52 | 0.09708 | 0.96676 | 0.29219 |
| P53 | 0.28746 | 0.77658 | 0.06421 |
| P54 | 0.14862 | 0.92479 | 0.15267 |
| P55 | 0.00459 | 0.73458 | 0.24215 |
| P56 | 0.36572 | 0.87513 | 0.32936 |
| P57 | 0.12079 | 0.77658 | 0.06421 |
| P58 | 0.48195 | 0.92479 | 0.15267 |
| P59 | 0.34178 | 0.73592 | 0.24095 |
| P60 | 0.19126 | 0.87544 | 0.32889 |
| P61 | 0.52354 | 0.86913 | 0.01998 |
| P62 | 0.88470 | 0.68402 | 0.10844 |
| P63 | 0.74402 | 0.82982 | 0.19891 |
| P64 | 0.59823 | 0.96838 | 0.29233 |
| P65 | 0.78746 | 0.77658 | 0.06421 |
| P66 | 0.64862 | 0.92479 | 0.15267 |
| P67 | 0.50568 | 0.73522 | 0.24139 |
| P68 | 0.86505 | 0.87458 | 0.32908 |
| P69 | 0.62079 | 0.77658 | 0.06421 |
| P70 | 0.98195 | 0.92479 | 0.15267 |

---

---

|     |         |         |         |
|-----|---------|---------|---------|
| P71 | 0.83957 | 0.73477 | 0.24080 |
| P72 | 0.69130 | 0.87556 | 0.32920 |
| C1  | 0.58663 | 0.51613 | 0.45887 |
| C2  | 0.74914 | 0.65082 | 0.45297 |
| C3  | 0.71059 | 0.68264 | 0.46624 |
| C4  | 0.60664 | 0.59663 | 0.46932 |
| C5  | 0.49146 | 0.40704 | 0.45213 |
| C6  | 0.84519 | 0.70777 | 0.43387 |
| O1  | 0.67170 | 0.54720 | 0.44941 |
| O2  | 0.40689 | 0.38174 | 0.46478 |
| O3  | 0.86853 | 0.67314 | 0.41013 |
| H1  | 0.75398 | 0.76046 | 0.47039 |
| H2  | 0.55147 | 0.59235 | 0.47627 |
| H3  | 0.49298 | 0.36129 | 0.47435 |
| H4  | 0.48452 | 0.38855 | 0.40938 |
| H5  | 0.90108 | 0.78983 | 0.43895 |
| H6  | 0.39689 | 0.37396 | 0.50325 |

---



## References

1. A. P. Abbott, D. Boothby, G. Capper, D. L. Davies and R. K. Rasheed, *J. Am. Chem. Soc.*, 2004, **126**, 9142-9147.
2. G. Kresse and J. Furthmuller, *Phys. Rev. B*, 1996, **54**, 11169.
3. J. P. Perdew, K. Burke and M. Ernzerhof, *Phys. Rev. Lett.*, 1996, **77**, 3865.
4. B. Hammer, L. B. Hansen and J. K. Norskov, *Phys. Rev. B*, 1999, **59**, 7413.
5. S. Grimme, *J. Comput. Chem.*, 2006, **27**, 1787-1799.
6. T. Wu, Z. Xu, X. Wang, M. Luo, Y. Xia, X. Zhang, J. Li, J. Liu, J. Wang, H.-L. Wang and F. Huang, *Appl. Catal., B*, 2023, **323**, 122126.
7. C. Chen, Z. Zhou, J. Liu, B. Zhu, H. Hu, Y. Yang, G. Chen, M. Gao and J. Zhang, *Appl. Catal., B*, 2022, **307**, 121209.
8. M. Zhou, J. Chen and Y. Li, *Catal. Sci. Technol.*, 2022, **12**, 4288-4297.
9. S. Yang, X. Xiang, Z. He, W. Zhong, C. Jia, Z. Gong, N. Zhang, S. Zhao and Y. Chen, *Chem. Eng. J.*, 2023, **457**, 141344.
10. J. Bi, H. Ying, H. Xu, X. Zhao, X. Du, J. Hao and Z. Li, *Chem. Commun.*, 2022, **58**, 7817-7820.
11. G. Yang, Y. Jiao, H. Yan, Y. Xie, A. Wu, X. Dong, D. Guo, C. Tian and H. Fu, *Adv. Mater.*, 2020, **32**, 2000455.
12. C. Yang, C. Wang, L. Zhou, W. Duan, Y. Song, F. Zhang, Y. Zhen, J. Zhang, W. Bao, Y. Lu, D. Wang and F. Fu, *Chem. Eng. J.*, 2021, **422**, 130125.
13. B. Zhang, H. Fu and T. Mu, *Green Chem.*, 2022, **24**, 877-884.
14. Y. Sun, J. Wang, Y. Qi, W. Li and C. Wang, *Adv. Sci.*, 2022, **9**, 2200957.

15. G. Zhao, G. Hai, P. Zhou, Z. Liu, Y. Zhang, B. Peng, W. Xia, X. Huang and G. Wang, *Adv. Funct. Mater.*, 2023, **33**, 2213170.
16. M. J. Kang, H. Park, J. Jegal, S. Y. Hwang, Y. S. Kang and H. G. Cha, *Appl. Catal., B*, 2019, **242**, 85-91.
